# Supplementary material for: A comparison of RNA amplification techniques at sub-nanogram input concentration
Source: PubMed Central journal article supplement (PMC2724417; doi:10.1186/1471-2164-10-326), 2009-07-20

Significant: 385  
Median # false significant: 0.08219

### SAM Plot

Delta 0.76345

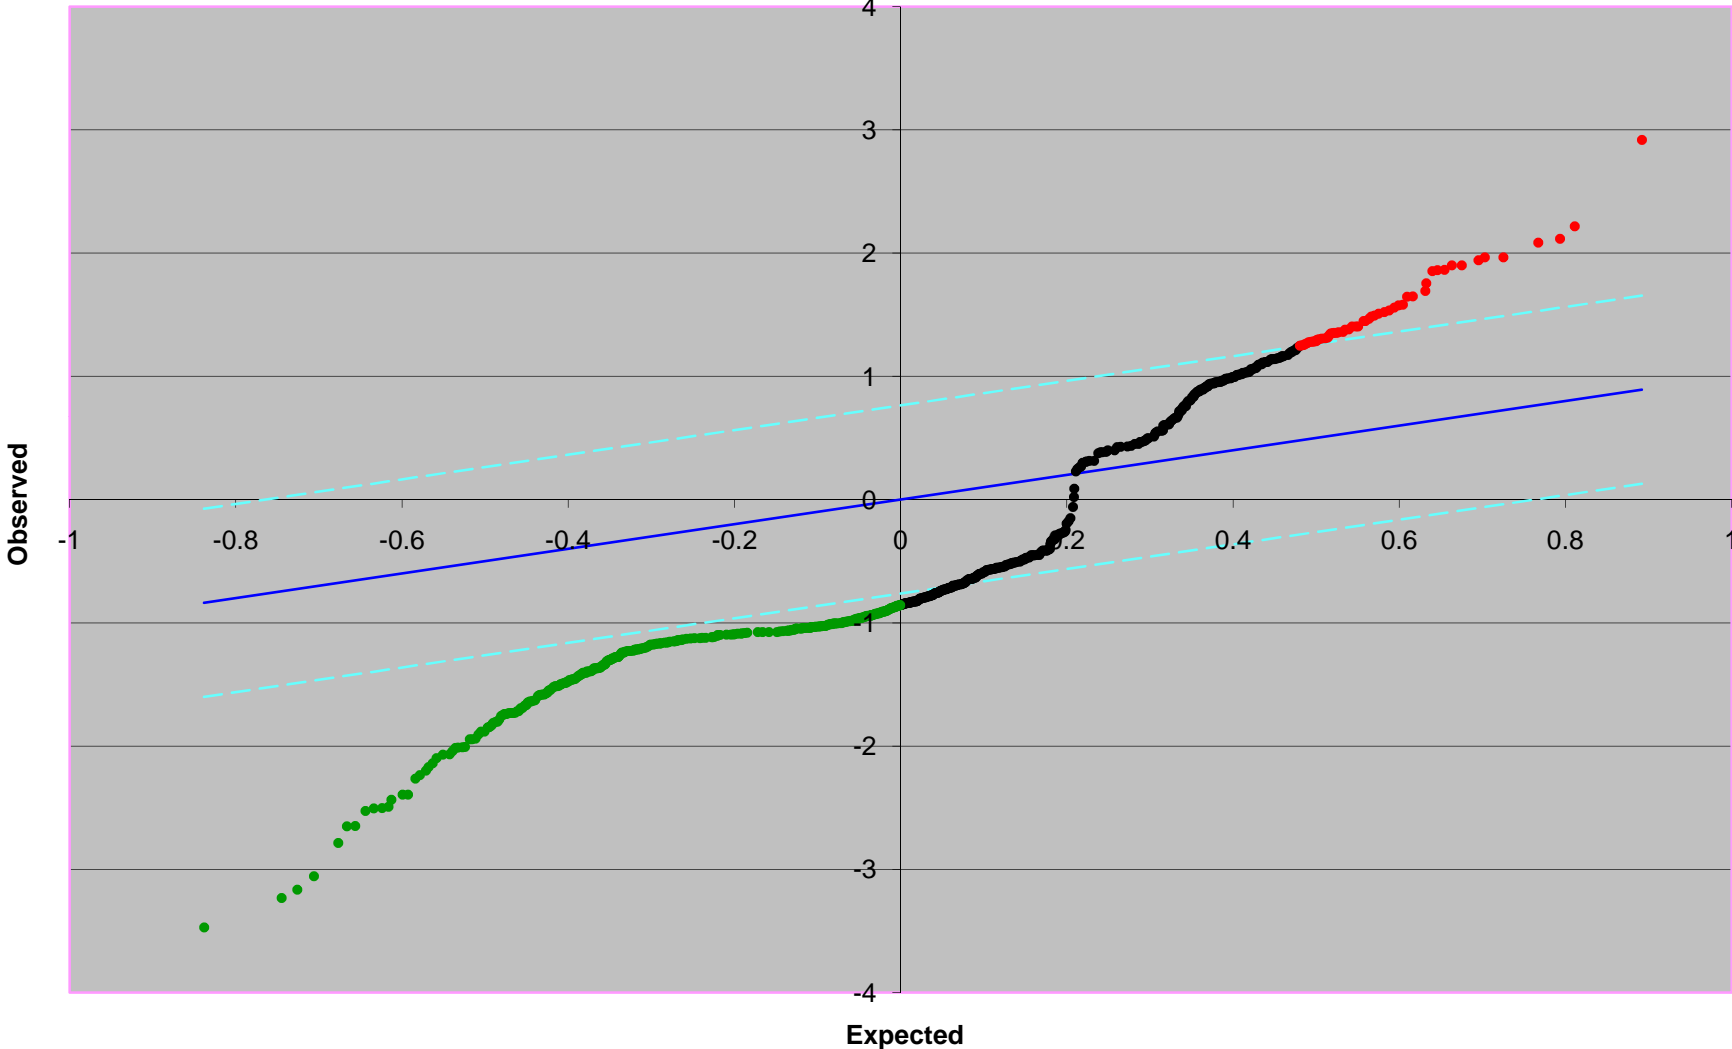

## Significant Genes List

### Input Parameters

Imputation Engine  
Data Type  
Number of Permutations  
Blocked Permutation?  
RNG Seed  
Delta  
(Upper Cutoff, Lower Cutoff)

### Computed Quantities

Computed Exchangeability Factor S0  
S0 percentile  
False Significant Number (Median, 90 percentile)  
False Discovery Rate (Median, 90 percentile)  
Pi0Hat

### 55 Positive Significant Genes

| Row | Gene Name                                                                                                 | Gene ID                   |
|-----|-----------------------------------------------------------------------------------------------------------|---------------------------|
| 553 | W72838::ESTs                                                                                              | <a href="#">W72838</a>    |
| 555 | missing90                                                                                                 | <a href="#">missing90</a> |
| 649 | H20138::RAB6, member RAS oncogene family                                                                  | <a href="#">H20138</a>    |
| 616 | AA478298::adipose specific 2                                                                              | <a href="#">AA478298</a>  |
| 605 | AA155695::transcobalamin I (vitamin B12 binding protein, R binder family)                                 | <a href="#">AA155695</a>  |
| 621 | R63647::prolactin receptor                                                                                | <a href="#">R63647</a>    |
| 586 | AA029597::bone morphogenetic protein 7 (osteogenic protein 1)                                             | <a href="#">AA029597</a>  |
| 606 | AA054073::carcinoembryonic antigen-related cell adhesion molecule 6 (non-specific cross reacting antigen) | <a href="#">AA054073</a>  |
| 561 | N48258::ESTs                                                                                              | <a href="#">N48258</a>    |
| 580 | W73473::bone morphogenetic protein 7 (osteogenic protein 1)                                               | <a href="#">W73473</a>    |
| 629 | R68997::ESTs                                                                                              | <a href="#">R68997</a>    |
| 533 | AA055768::ESTs                                                                                            | <a href="#">AA055768</a>  |
| 614 | H13688::UDP-N-acetyl-alpha-D-galactosamine:polypeptide N-acetylgalactosaminyltransferase 3 (GalNAc-T3)    | <a href="#">H13688</a>    |
| 637 | AA496149::3-hydroxy-3-methylglutaryl-Coenzyme A synthase 2 (mitochondrial)                                | <a href="#">AA496149</a>  |
| 633 | AA218915::EST                                                                                             | <a href="#">AA218915</a>  |
| 636 | R70505::purinergic receptor P2Y, G-protein coupled, 2                                                     | <a href="#">R70505</a>    |
| 607 | N50681::ESTs                                                                                              | <a href="#">N50681</a>    |
| 581 | T95747::pregnancy specific beta-1-glycoprotein 1                                                          | <a href="#">T95747</a>    |
| 570 | AA485052::proteasome (prosome, macropain) 26S subunit, non-ATPase, 3                                      | <a href="#">AA485052</a>  |
| 563 | N30553::pregnancy specific beta-1-glycoprotein 4                                                          | <a href="#">N30553</a>    |
| 559 | W91882::EST                                                                                               | <a href="#">W91882</a>    |
| 669 | N74131::Human secretory protein (P1.B) mRNA, complete cds                                                 | <a href="#">N74131</a>    |
| 641 | R76554::calmodulin 1 (phosphorylase kinase, delta)                                                        | <a href="#">R76554</a>    |
| 599 | AA464421::zinc finger protein 144 (Mel-18)                                                                | <a href="#">AA464421</a>  |
| 608 | AA453783::Homo sapiens mRNA; cDNA DKFZp564B1264 (from clone DKFZp564B1264)                                | <a href="#">AA453783</a>  |
| 578 | H97778::cadherin 1, E-cadherin (epithelial)                                                               | <a href="#">H97778</a>    |
| 619 | H95976::ESTs                                                                                              | <a href="#">H95976</a>    |
| 571 | AA455291::ESTs                                                                                            | <a href="#">AA455291</a>  |
| 603 | T56316::nerve growth factor, beta polypeptide                                                             | <a href="#">T56316</a>    |
| 615 | W51985::pregnancy specific beta-1-glycoprotein 11                                                         | <a href="#">W51985</a>    |
| 648 | AA456598::ESTs                                                                                            | <a href="#">AA456598</a>  |
| 536 | R73909::pregnancy specific beta-1-glycoprotein 11                                                         | <a href="#">R73909</a>    |
| 631 | AA495846::ras homolog gene family, member B                                                               | <a href="#">AA495846</a>  |
| 558 | W37780::ESTs                                                                                              | <a href="#">W37780</a>    |
| 592 | AA151245::ESTs                                                                                            | <a href="#">AA151245</a>  |
| 584 | AA136565::ESTs                                                                                            | <a href="#">AA136565</a>  |
| 587 | T77883::EST                                                                                               | <a href="#">T77883</a>    |
| 632 | AA477298::branched chain keto acid dehydrogenase E1, alpha polypeptide (maple syrup urine disease)        | <a href="#">AA477298</a>  |
| 611 | H01197::ESTs                                                                                              | <a href="#">H01197</a>    |
| 668 | AA453404::PPAR binding protein                                                                            | <a href="#">AA453404</a>  |
| 582 | H80359::phosphatidylinositol-4-phosphate 5-kinase, type II, beta                                          | <a href="#">H80359</a>    |
| 537 | AA708301::ESTs                                                                                            | <a href="#">AA708301</a>  |
| 528 | AA262080::solute carrier family 12 (sodium/potassium/chloride transporters), member 2                     | <a href="#">AA262080</a>  |
| 639 | N90806::ESTs                                                                                              | <a href="#">N90806</a>    |
| 595 | R32952::S100 calcium-binding protein P                                                                    | <a href="#">R32952</a>    |
| 589 | W47576::ESTs                                                                                              | <a href="#">W47576</a>    |
| 541 | AA418081::ESTs                                                                                            | <a href="#">AA418081</a>  |
| 560 | H62594::tyrosine 3-monooxygenase/tryptophan 5-monooxygenase activation protein, beta polypeptide          | <a href="#">H62594</a>    |
| 590 | AA489569::keratin 7                                                                                       | <a href="#">AA489569</a>  |
| 617 | H62594::tyrosine 3-monooxygenase/tryptophan 5-monooxygenase activation protein, beta polypeptide          | <a href="#">H62594</a>    |
| 609 | AA046424::ESTs, Weakly similar to HYPOTHETICAL PROTEIN ZAP128 [H.sapiens]                                 | <a href="#">AA046424</a>  |
| 597 | H53703::growth factor receptor-bound protein 7                                                            | <a href="#">H53703</a>    |
| 554 | R76229::ESTs, Highly similar to CGI-52 protein [H.sapiens]                                                | <a href="#">R76229</a>    |
| 569 | AA464250::keratin 19                                                                                      | <a href="#">AA464250</a>  |
| 576 | AA504128::RAE1 (RNA export 1, S.pombe) homolog                                                            | <a href="#">AA504128</a>  |

### 330 Negative Significant Genes

| Row | Gene Name                                                                                                                      | Gene ID                    |
|-----|--------------------------------------------------------------------------------------------------------------------------------|----------------------------|
| 233 | N68719::ESTs                                                                                                                   | <a href="#">N68719</a>     |
| 230 | H79534::hemoglobin, epsilon 1                                                                                                  | <a href="#">H79534</a>     |
| 266 | T90857::ESTs                                                                                                                   | <a href="#">T90857</a>     |
| 208 | R62612::fibronectin 1                                                                                                          | <a href="#">R62612</a>     |
| 164 | H93837::apolipoprotein B (including Ag(x) antigen)                                                                             | <a href="#">H93837</a>     |
| 302 | R62612::fibronectin 1                                                                                                          | <a href="#">R62612</a>     |
| 173 | W56586::ESTs                                                                                                                   | <a href="#">W56586</a>     |
| 254 | H59861::thrombomodulin                                                                                                         | <a href="#">H59861</a>     |
| 171 | AA598601::insulin-like growth factor binding protein 3                                                                         | <a href="#">AA598601</a>   |
| 318 | H95960::secreted protein, acidic, cysteine-rich (osteonectin)                                                                  | <a href="#">H95960</a>     |
| 219 | R95691::CAG repeat domain                                                                                                      | <a href="#">R95691</a>     |
| 137 | AA478542::A kinase (PRKA) anchor protein (gravin) 12                                                                           | <a href="#">AA478542</a>   |
| 247 | H69531::transferrin                                                                                                            | <a href="#">H69531</a>     |
| 180 | N54596::insulin-like growth factor 2 (somatomedin A)                                                                           | <a href="#">N54596</a>     |
| 270 | R11698::ubiquinol-cytochrome c reductase hinge protein                                                                         | <a href="#">R11698</a>     |
| 136 | N54596::insulin-like growth factor 2 (somatomedin A)                                                                           | <a href="#">N54596</a>     |
| 207 | N59721::CAG repeat domain                                                                                                      | <a href="#">N59721</a>     |
| 255 | R60343::5' nucleotidase (CD73)                                                                                                 | <a href="#">R60343</a>     |
| 294 | T67053::Human rearranged immunoglobulin lambda light chain mRNA                                                                | <a href="#">T67053</a>     |
| 176 | H38240::thrombospondin 2                                                                                                       | <a href="#">H38240</a>     |
| 260 | H96654::ESTs, Weakly similar to gene pp21 protein [H.sapiens]                                                                  | <a href="#">H96654</a>     |
| 306 | R45941::protein tyrosine phosphatase, receptor type, N                                                                         | <a href="#">R45941</a>     |
| 214 | N63943::lysozyme (renal amyloidosis)                                                                                           | <a href="#">N63943</a>     |
| 501 | AA620437::Homo sapiens mRNA; cDNA DKFZp566E183 (from clone DKFZp566E183)                                                       | <a href="#">AA620437</a>   |
| 234 | T62547::insulin-like growth factor 2 receptor                                                                                  | <a href="#">T62547</a>     |
| 223 | R02346::small nuclear ribonucleoprotein 70kD polypeptide (RNP antigen)                                                         | <a href="#">R02346</a>     |
| 342 | AA043133::solute carrier family 16 (monocarboxylic acid transporters), member 1                                                | <a href="#">AA043133</a>   |
| 248 | R17717::cadherin 13, H-cadherin (heart)                                                                                        | <a href="#">R17717</a>     |
| 414 | R01937::EST                                                                                                                    | <a href="#">R01937</a>     |
| 245 | AA453969::lactate dehydrogenase C                                                                                              | <a href="#">AA453969</a>   |
| 212 | H99415::A kinase (PRKA) anchor protein 2                                                                                       | <a href="#">H99415</a>     |
| 143 | AA233809::transforming growth factor, beta 2                                                                                   | <a href="#">AA233809</a>   |
| 141 | AA039370::Homo sapiens transcriptional enhancer factor (TEF1) DNA, complete CDS                                                | <a href="#">AA039370</a>   |
| 335 | H68848::apolipoprotein H (beta-2-glycoprotein I)                                                                               | <a href="#">H68848</a>     |
| 221 | AA282906::CD44 antigen (homing function and Indian blood group system)                                                         | <a href="#">AA282906</a>   |
| 222 | W81128::Homo sapiens mRNA; cDNA DKFZp586H0919 (from clone DKFZp586H0919)                                                       | <a href="#">W81128</a>     |
| 283 | H09461::putative gene product                                                                                                  | <a href="#">H09461</a>     |
| 483 | missing51                                                                                                                      | <a href="#">missing51</a>  |
| 175 | AA055835::caveolin 1, caveolae protein, 22kD                                                                                   | <a href="#">AA055835</a>   |
| 284 | AA775872::glypican 3                                                                                                           | <a href="#">AA775872</a>   |
| 420 | AA482593::ESTs                                                                                                                 | <a href="#">AA482593</a>   |
| 477 | W45275::CD44 antigen (homing function and Indian blood group system)                                                           | <a href="#">W45275</a>     |
| 381 | AA399473::tissue factor pathway inhibitor 2                                                                                    | <a href="#">AA399473</a>   |
| 206 | N91921::T-cell receptor, beta cluster                                                                                          | <a href="#">N91921</a>     |
| 152 | AA633993::cell division cycle 10 (homologous to CDC10 of S. cerevisiae)                                                        | <a href="#">AA633993</a>   |
| 182 | AA487812::vimentin                                                                                                             | <a href="#">AA487812</a>   |
| 240 | AA086475::cullin 5                                                                                                             | <a href="#">AA086475</a>   |
| 224 | R93124::aldo-keto reductase family 1, member C1 (dihydrodiol dehydrogenase 1; 20-alpha (3-alpha)-hydroxysteroid dehydrogenase) | <a href="#">R93124</a>     |
| 149 | AA112105::farnesyltransferase, CAAX box, alpha                                                                                 | <a href="#">AA112105</a>   |
| 156 | AA683077::ribosomal protein L37                                                                                                | <a href="#">AA683077</a>   |
| 261 | T97889::solute carrier family 2 (facilitated glucose transporter), member 3                                                    | <a href="#">T97889</a>     |
| 349 | AA055946::CD3D antigen, delta polypeptide (TIT3 complex)                                                                       | <a href="#">AA055946</a>   |
| 187 | T56948::Human mRNA for KIAA0099 gene, complete cds                                                                             | <a href="#">T56948</a>     |
| 326 | AA279072::inositol polyphosphate phosphatase-like 1                                                                            | <a href="#">AA279072</a>   |
| 217 | H86554::ceruloplasmin (ferroxidase)                                                                                            | <a href="#">H86554</a>     |
| 200 | AA282134::glutaminyl-peptide cyclotransferase (glutaminyl cyclase)                                                             | <a href="#">AA282134</a>   |
| 465 | N26285::fibronectin 1                                                                                                          | <a href="#">N26285</a>     |
| 253 | T89996::FOS-like antigen-1                                                                                                     | <a href="#">T89996</a>     |
| 190 | H26271::ESTs                                                                                                                   | <a href="#">H26271</a>     |
| 153 | AA436479::ESTs, Weakly similar to Grb14 [H.sapiens]                                                                            | <a href="#">AA436479</a>   |
| 158 | R92216::ESTs, Weakly similar to putative p150 [H.sapiens]                                                                      | <a href="#">R92216</a>     |
| 322 | AA678160::ESTs                                                                                                                 | <a href="#">AA678160</a>   |
| 201 | H23978::general transcription factor IIB                                                                                       | <a href="#">H23978</a>     |
| 415 | AA400292::ESTs                                                                                                                 | <a href="#">AA400292</a>   |
| 198 | Missing157                                                                                                                     | <a href="#">Missing157</a> |
| 280 | N34436::v-maf musculoaponeurotic fibrosarcoma (avian) oncogene homolog                                                         | <a href="#">N34436</a>     |
| 268 | T77595::hexabrachion (tenascin C, cytotactin)                                                                                  | <a href="#">T77595</a>     |
| 329 | AA046525::Homo sapiens, alpha-1 (VI) collagen                                                                                  | <a href="#">AA046525</a>   |
| 272 | H64380::ESTs                                                                                                                   | <a href="#">H64380</a>     |
| 250 | H10068::Homo sapiens clone 24466 mRNA sequence                                                                                 | <a href="#">H10068</a>     |
| 277 | SSH121e1                                                                                                                       | <a href="#">SSH121e1</a>   |
| 144 | AA150532::keratin 6B                                                                                                           | <a href="#">AA150532</a>   |
| 183 | T53220::fatty acid binding protein 1, liver                                                                                    | <a href="#">T53220</a>     |
| 205 | AA775447::alpha-2-macroglobulin                                                                                                | <a href="#">AA775447</a>   |
| 344 | W49672::wingless-type MMTV integration site family, member 5A                                                                  | <a href="#">W49672</a>     |
| 276 | AA099153::tissue inhibitor of metalloproteinase 3 (Sorsby fundus dystrophy, pseudoinflammatory)                                | <a href="#">AA099153</a>   |
| 151 | N73836::ESTs                                                                                                                   | <a href="#">N73836</a>     |

|                                                                                                                                     |                            |
|-------------------------------------------------------------------------------------------------------------------------------------|----------------------------|
| 238 H14231::ESTs                                                                                                                    | <a href="#">H14231</a>     |
| 169 AA706738::ESTs                                                                                                                  | <a href="#">AA706738</a>   |
| 330 AA862371::interferon-inducible                                                                                                  | <a href="#">AA862371</a>   |
| 210 R62603::collagen, type VI, alpha 3                                                                                              | <a href="#">R62603</a>     |
| 518 AA775616::secreted phosphoprotein 1 (osteopontin, bone sialoprotein I, early T-lymphocyte activation 1)                         | <a href="#">AA775616</a>   |
| 278 R37411::Homo sapiens guanine deaminase (GDA), mRNA                                                                              | <a href="#">R37411</a>     |
| 202 AA284693::transcription factor AP-4 (activating enhancer-binding protein 4)                                                     | <a href="#">AA284693</a>   |
| 313 H17550::ESTs                                                                                                                    | <a href="#">H17550</a>     |
| 495 AA488626::ubiquitin-like 1 (sentrin)                                                                                            | <a href="#">AA488626</a>   |
| 399 T98352::Homo sapiens clone 24483 unknown mRNA, parital cds                                                                      | <a href="#">T98352</a>     |
| 327 AA449333::proteasome (prosome, macropain) subunit, alpha type, 4                                                                | <a href="#">AA449333</a>   |
| 251 W69134::ESTs                                                                                                                    | <a href="#">W69134</a>     |
| 471 AA700876::orosomuroid 1                                                                                                         | <a href="#">AA700876</a>   |
| 292 AA682293::phenylalanine hydroxylase                                                                                             | <a href="#">AA682293</a>   |
| 474 AA194983::tumor necrosis factor receptor superfamily, member 11b (osteoprotegerin)                                              | <a href="#">AA194983</a>   |
| 271 AA063573::ESTs                                                                                                                  | <a href="#">AA063573</a>   |
| 305 AA425947::regulated in glioma                                                                                                   | <a href="#">AA425947</a>   |
| 147 AA227594::mal, T-cell differentiation protein                                                                                   | <a href="#">AA227594</a>   |
| 298 missing226                                                                                                                      | <a href="#">missing226</a> |
| 237 N67039::ESTs                                                                                                                    | <a href="#">N67039</a>     |
| 341 H87471::kynureninase (L-kynurenine hydrolase)                                                                                   | <a href="#">H87471</a>     |
| 274 AA043501::v-maf musculoaponeurotic fibrosarcoma (avian) oncogene homolog                                                        | <a href="#">AA043501</a>   |
| 179 H15662::KIAA0291 protein                                                                                                        | <a href="#">H15662</a>     |
| 155 AA496878::ESTs, Weakly similar to FK506-binding protein [H.sapiens]                                                             | <a href="#">AA496878</a>   |
| 407 T68892::secreted frizzled-related protein 1                                                                                     | <a href="#">T68892</a>     |
| 379 AA292074::ubiquitin-conjugating enzyme E2L 6                                                                                    | <a href="#">AA292074</a>   |
| 166 R97220::ESTs                                                                                                                    | <a href="#">R97220</a>     |
| 246 R22977::moesin                                                                                                                  | <a href="#">R22977</a>     |
| 218 H80685::P311 protein                                                                                                            | <a href="#">H80685</a>     |
| 199 AA136707::procollagen-lysine, 2-oxoglutarate 5-dioxygenase (lysine hydroxylase) 2                                               | <a href="#">AA136707</a>   |
| 263 H58644::ESTs                                                                                                                    | <a href="#">H58644</a>     |
| 249 R10382::protein C inhibitor (plasminogen activator inhibitor III)                                                               | <a href="#">R10382</a>     |
| 347 AA447528::homolog of yeast ( <i>S. cerevisiae</i> ) ufd2                                                                        | <a href="#">AA447528</a>   |
| 216 AA258396::pleckstrin homology-like domain, family A, member 1                                                                   | <a href="#">AA258396</a>   |
| 384 AA633751::palmitoyl-protein thioesterase 2                                                                                      | <a href="#">AA633751</a>   |
| 220 R92227::ESTs, Weakly similar to beta-TrCP protein E3RS-IkappaB [M.musculus]                                                     | <a href="#">R92227</a>     |
| 161 N93505::transmembrane 4 superfamily member 2                                                                                    | <a href="#">N93505</a>     |
| 312 H99816::procollagen-lysine, 2-oxoglutarate 5-dioxygenase (lysine hydroxylase) 2                                                 | <a href="#">H99816</a>     |
| 145 T82817::FOS-like antigen-1                                                                                                      | <a href="#">T82817</a>     |
| 512 AA485371::bone marrow stromal cell antigen 2                                                                                    | <a href="#">AA485371</a>   |
| 297 AA102526::interleukin 8                                                                                                         | <a href="#">AA102526</a>   |
| 148 N21633::ESTs, Highly similar to NESTIN [H.sapiens]                                                                              | <a href="#">N21633</a>     |
| 282 W86431::protein C inhibitor (plasminogen activator inhibitor III)                                                               | <a href="#">W86431</a>     |
| 359 R42177::KIAA0759 protein                                                                                                        | <a href="#">R42177</a>     |
| 299 N47524::ESTs, Highly similar to mitogen-induced [M.musculus]                                                                    | <a href="#">N47524</a>     |
| 135 AA454562::ESTs                                                                                                                  | <a href="#">AA454562</a>   |
| 242 W73144::lymphocyte cytosolic protein 1 (L-plastin)                                                                              | <a href="#">W73144</a>     |
| 418 AA633569::aldehyde dehydrogenase 10 (fatty aldehyde dehydrogenase)                                                              | <a href="#">AA633569</a>   |
| 293 AA159620::ecotropic viral integration site 2B                                                                                   | <a href="#">AA159620</a>   |
| 189 T48949::Rhesus blood group-associated glycoprotein                                                                              | <a href="#">T48949</a>     |
| 378 AA456474::apolipoprotein C-II                                                                                                   | <a href="#">AA456474</a>   |
| 493 AA701860::follistatin                                                                                                           | <a href="#">AA701860</a>   |
| 482 N52362::Homo sapiens mRNA; cDNA DKFZp586E1624 (from clone DKFZp586E1624)                                                        | <a href="#">N52362</a>     |
| 307 W74668::glycophorin C (Gerbich blood group)                                                                                     | <a href="#">W74668</a>     |
| 343 AA011681::DiGeorge syndrome gene D                                                                                              | <a href="#">AA011681</a>   |
| 256 AA256231::Gardner-Rasheed feline sarcoma viral (v-fgr) oncogene homolog                                                         | <a href="#">AA256231</a>   |
| 337 AA487846::ESTs                                                                                                                  | <a href="#">AA487846</a>   |
| 236 H15718::AXL receptor tyrosine kinase                                                                                            | <a href="#">H15718</a>     |
| 150 AA418392::ESTs                                                                                                                  | <a href="#">AA418392</a>   |
| 388 AA431795::ESTs                                                                                                                  | <a href="#">AA431795</a>   |
| 410 R43605::KIAA0293 protein                                                                                                        | <a href="#">R43605</a>     |
| 336 AA490238::mitogen inducible 2                                                                                                   | <a href="#">AA490238</a>   |
| 301 AA431571::ESTs                                                                                                                  | <a href="#">AA431571</a>   |
| 496 R06634::inter-alpha (globulin) inhibitor, H2 polypeptide                                                                        | <a href="#">R06634</a>     |
| 498 AA863383::pim-2 oncogene                                                                                                        | <a href="#">AA863383</a>   |
| 311 H23235::platelet-derived growth factor receptor, alpha polypeptide                                                              | <a href="#">H23235</a>     |
| 195 N39240::ESTs                                                                                                                    | <a href="#">N39240</a>     |
| 229 AA487893::transmembrane 4 superfamily member 1                                                                                  | <a href="#">AA487893</a>   |
| 403 R09069::glucan (1,4-alpha-), branching enzyme 1 (glycogen branching enzyme, Andersen disease, glycogen storage disease type IV) | <a href="#">R09069</a>     |
| 333 H57052::ESTs                                                                                                                    | <a href="#">H57052</a>     |
| 286 AA479781::radixin                                                                                                               | <a href="#">AA479781</a>   |
| 186 N40975::EST                                                                                                                     | <a href="#">N40975</a>     |
| 134 N77198::ESTs                                                                                                                    | <a href="#">N77198</a>     |
| 300 T80932::ESTs                                                                                                                    | <a href="#">T80932</a>     |
| 332 AA406546::Homo sapiens mRNA; cDNA DKFZp564F053 (from clone DKFZp564F053)                                                        | <a href="#">AA406546</a>   |
| 204 AA477165::radixin                                                                                                               | <a href="#">AA477165</a>   |
| 324 AA291577::interferon-stimulated transcription factor 3, gamma (48kD)                                                            | <a href="#">AA291577</a>   |
| 196 AA293671::CD8 antigen, beta polypeptide 1 (p37)                                                                                 | <a href="#">AA293671</a>   |

|                                                                                                                                      |                          |
|--------------------------------------------------------------------------------------------------------------------------------------|--------------------------|
| 225 AA173428::ESTs                                                                                                                   | <a href="#">AA173428</a> |
| 172 R59724::ESTs                                                                                                                     | <a href="#">R59724</a>   |
| 227 AA150263::ESTs                                                                                                                   | <a href="#">AA150263</a> |
| 209 AA291163::glutaredoxin (thioltransferase)                                                                                        | <a href="#">AA291163</a> |
| 340 R33755::glutathione S-transferase pi                                                                                             | <a href="#">R33755</a>   |
| 241 AA486280::tissue inhibitor of metalloproteinase 2                                                                                | <a href="#">AA486280</a> |
| 296 N74889::ESTs                                                                                                                     | <a href="#">N74889</a>   |
| 285 AA620379::KIAA0878 protein                                                                                                       | <a href="#">AA620379</a> |
| 133 AA459868::ubiquitin-conjugating enzyme E2E 3 (homologous to yeast UBC4/5)                                                        | <a href="#">AA459868</a> |
| 281 AA489636::ESTs                                                                                                                   | <a href="#">AA489636</a> |
| 413 R52339::Homo sapiens clone 25114 mRNA sequence                                                                                   | <a href="#">R52339</a>   |
| 235 AA668470::regulator of G-protein signalling 5                                                                                    | <a href="#">AA668470</a> |
| 138 AA598794::connective tissue growth factor                                                                                        | <a href="#">AA598794</a> |
| 257 R88506::ESTs, Weakly similar to SRrp129 [H.sapiens]                                                                              | <a href="#">R88506</a>   |
| 363 R37566::ESTs                                                                                                                     | <a href="#">R37566</a>   |
| 239 AA173755::ESTs                                                                                                                   | <a href="#">AA173755</a> |
| 211 AA233079::insulin-like growth factor binding protein 1                                                                           | <a href="#">AA233079</a> |
| 486 AA599094::KIAA0878 protein                                                                                                       | <a href="#">AA599094</a> |
| 383 N67770::silver (mouse homolog) like                                                                                              | <a href="#">N67770</a>   |
| 303 AA884897::ELL-RELATED RNA POLYMERASE II, ELONGATION FACTOR                                                                       | <a href="#">AA884897</a> |
| 409 AA447978::retinaldehyde dehydrogenase 2                                                                                          | <a href="#">AA447978</a> |
| 481 H91680::phosphorylase, glycogen; liver (Hers disease, glycogen storage disease type VI)                                          | <a href="#">H91680</a>   |
| 197 H09748::ESTs                                                                                                                     | <a href="#">H09748</a>   |
| 226 H20717::ESTs                                                                                                                     | <a href="#">H20717</a>   |
| 252 N73091::ribosomal protein S23                                                                                                    | <a href="#">N73091</a>   |
| 459 AA406551::solute carrier family 2 (facilitated glucose transporter), member 3                                                    | <a href="#">AA406551</a> |
| 162 H95348::ESTs                                                                                                                     | <a href="#">H95348</a>   |
| 275 H10192::ESTs                                                                                                                     | <a href="#">H10192</a>   |
| 323 N26562::melan-A                                                                                                                  | <a href="#">N26562</a>   |
| 416 AA443119::Homo sapiens mRNA; cDNA DKFZp586L2123 (from clone DKFZp586L2123)                                                       | <a href="#">AA443119</a> |
| 258 AA936799::matrix metalloproteinase 2 (gelatinase A, 72kD gelatinase, 72kD type IV collagenase)                                   | <a href="#">AA936799</a> |
| 310 R92801::ESTs                                                                                                                     | <a href="#">R92801</a>   |
| 449 N51499::A kinase (PRKA) anchor protein 2                                                                                         | <a href="#">N51499</a>   |
| 315 T83821::ESTs, Weakly similar to KIAA0638 protein [H.sapiens]                                                                     | <a href="#">T83821</a>   |
| 243 AA486082::serum/glucocorticoid regulated kinase                                                                                  | <a href="#">AA486082</a> |
| 203 W01240::membrane protein, palmitoylated 1 (55kD)                                                                                 | <a href="#">W01240</a>   |
| 146 R66057::ESTs, Weakly similar to envelope protein [H.sapiens]                                                                     | <a href="#">R66057</a>   |
| 269 R71124::ESTs                                                                                                                     | <a href="#">R71124</a>   |
| 139 AA458653::Homo sapiens mRNA for GS3955, complete cds                                                                             | <a href="#">AA458653</a> |
| 475 AA490777::glutathione S-transferase theta 2                                                                                      | <a href="#">AA490777</a> |
| 264 AA456394::four and a half LIM domains 1                                                                                          | <a href="#">AA456394</a> |
| 193 AA127069::DKFZP586E1621 protein                                                                                                  | <a href="#">AA127069</a> |
| 441 AA775257::integral membrane protein 2A                                                                                           | <a href="#">AA775257</a> |
| 505 AA704688::ESTs                                                                                                                   | <a href="#">AA704688</a> |
| 419 R09561::decay accelerating factor for complement (CD55, Cromer blood group system)                                               | <a href="#">R09561</a>   |
| 168 H05445::growth associated protein 43                                                                                             | <a href="#">H05445</a>   |
| 228 H57309::slug (chicken homolog), zinc finger protein                                                                              | <a href="#">H57309</a>   |
| 464 AA148524::ESTs                                                                                                                   | <a href="#">AA148524</a> |
| 412 AA461065::mercaptopyruvate sulfurtransferase                                                                                     | <a href="#">AA461065</a> |
| 265 W01011::SA (rat hypertension-associated) homolog                                                                                 | <a href="#">W01011</a>   |
| 92 AA137180::EST                                                                                                                     | <a href="#">AA137180</a> |
| 259 AA620462::ESTs, Weakly similar to TRANSFORMATION-SENSITIVE PROTEIN IEF SSP 3521 [H.sapiens]                                      | <a href="#">AA620462</a> |
| 321 AA598817::preferentially expressed antigen in melanoma                                                                           | <a href="#">AA598817</a> |
| 194 T53298::insulin-like growth factor binding protein 7                                                                             | <a href="#">T53298</a>   |
| 485 H46553::transcription factor 8 (represses interleukin 2 expression)                                                              | <a href="#">H46553</a>   |
| 181 AA001614::insulin receptor                                                                                                       | <a href="#">AA001614</a> |
| 348 AA228130::PC4 and SFRS1 interacting protein 1                                                                                    | <a href="#">AA228130</a> |
| 262 AA488609::nucleoporin 88kD                                                                                                       | <a href="#">AA488609</a> |
| 398 AA436565::ESTs                                                                                                                   | <a href="#">AA436565</a> |
| 287 R26163::ESTs, Weakly similar to !!!! ALU CLASS A WARNING ENTRY !!!! [H.sapiens]                                                  | <a href="#">R26163</a>   |
| 288 N20407::coagulation factor II (thrombin) receptor                                                                                | <a href="#">N20407</a>   |
| 479 AA496283::Thy-1 cell surface antigen                                                                                             | <a href="#">AA496283</a> |
| 174 AA169469::pyruvate dehydrogenase kinase, isoenzyme 4                                                                             | <a href="#">AA169469</a> |
| 476 AA858026::protein C inhibitor (plasminogen activator inhibitor III)                                                              | <a href="#">AA858026</a> |
| 360 AA490172::collagen, type I, alpha 2                                                                                              | <a href="#">AA490172</a> |
| 167 AA287196::tetraspan 3                                                                                                            | <a href="#">AA287196</a> |
| 140 AA457544::EST                                                                                                                    | <a href="#">AA457544</a> |
| 177 R76553::Homo sapiens a disintegrin-like and metalloprotease (repolysin type) with thrombospondin type 1 motif, 1 (ADAMTS1), mRNA | <a href="#">R76553</a>   |
| 160 R56916::Homo sapiens mRNA; cDNA DKFZp586F071 (from clone DKFZp586F071)                                                           | <a href="#">R56916</a>   |
| 338 AA131466::ESTs                                                                                                                   | <a href="#">AA131466</a> |
| 408 AA172056::ESTs                                                                                                                   | <a href="#">AA172056</a> |
| 159 AA609421::Homo sapiens BAC clone RG298G08 from 7p15-p21                                                                          | <a href="#">AA609421</a> |
| 191 R76614::ESTs                                                                                                                     | <a href="#">R76614</a>   |
| 372 AA670200::postmeiotic segregation increased 2-like 12                                                                            | <a href="#">AA670200</a> |
| 289 AA496005::albumin                                                                                                                | <a href="#">AA496005</a> |
| 170 AA418750::Homo sapiens clone 683 unknown mRNA, complete sequence                                                                 | <a href="#">AA418750</a> |
| 215 N62244::TAR (HIV) RNA-binding protein 1                                                                                          | <a href="#">N62244</a>   |
| 345 R11047::ESTs                                                                                                                     | <a href="#">R11047</a>   |



|                                                                                                                                               |                          |
|-----------------------------------------------------------------------------------------------------------------------------------------------|--------------------------|
| 244 AA455067::synuclein, alpha (non A4 component of amyloid precursor)                                                                        | <a href="#">AA455067</a> |
| 316 T89391::caveolin 2                                                                                                                        | <a href="#">T89391</a>   |
| 346 T95274::ESTs                                                                                                                              | <a href="#">T95274</a>   |
| 470 AA284668::plasminogen activator, urokinase                                                                                                | <a href="#">AA284668</a> |
| 290 AA164712::ESTs, Weakly similar to TRANSFORMATION-SENSITIVE PROTEIN IEF SSP 3521 [H.sapiens]                                               | <a href="#">AA164712</a> |
| 314 R78530::ESTs, Highly similar to deduced protein product shows significant homology to coactosin from Dictyostelium discoideum [H.sapiens] | <a href="#">R78530</a>   |
| 308 AA496955::ESTs                                                                                                                            | <a href="#">AA496955</a> |
| 185 H73724::cyclin-dependent kinase 6                                                                                                         | <a href="#">H73724</a>   |
| 462 R10378::fibrinogen-like 1                                                                                                                 | <a href="#">R10378</a>   |
| 319 N22980::FYN oncogene related to SRC, FGR, YES                                                                                             | <a href="#">N22980</a>   |
| 213 N62638::ESTs                                                                                                                              | <a href="#">N62638</a>   |
| 374 N52517::EST                                                                                                                               | <a href="#">N52517</a>   |
| 489 W70343::lysyl oxidase                                                                                                                     | <a href="#">W70343</a>   |
| 331 AA447746::ESTs                                                                                                                            | <a href="#">AA447746</a> |
| 178 H63077::annexin A1                                                                                                                        | <a href="#">H63077</a>   |
| 267 AA156749::ESTs                                                                                                                            | <a href="#">AA156749</a> |
| 231 AA449738::erythrocyte membrane protein band 4.1-like 2                                                                                    | <a href="#">AA449738</a> |
| 325 AA171784::ESTs                                                                                                                            | <a href="#">AA171784</a> |
| 320 N32295::alpha2,3-sialyltransferase                                                                                                        | <a href="#">N32295</a>   |
| 163 R83836::v-yes-1 Yamaguchi sarcoma viral related oncogene homolog                                                                          | <a href="#">R83836</a>   |
| 291 AA432268::ESTs                                                                                                                            | <a href="#">AA432268</a> |
| 511 AA683578::adenosine deaminase                                                                                                             | <a href="#">AA683578</a> |
| 232 R98628::EST                                                                                                                               | <a href="#">R98628</a>   |
| 356 N24076::KIAA0704 protein                                                                                                                  | <a href="#">N24076</a>   |
| 157 T95151::ESTs                                                                                                                              | <a href="#">T95151</a>   |
| 339 AA704222::ESTs                                                                                                                            | <a href="#">AA704222</a> |
| 423 R38539::fibroblast growth factor 2 (basic)                                                                                                | <a href="#">R38539</a>   |
| 355 H73479::ESTs, Weakly similar to EPIDERMAL GROWTH FACTOR RECEPTOR KINASE SUBSTRATE EPS8 [H.sapiens]                                        | <a href="#">H73479</a>   |
| 411 N77263::Human beta-type globin pseudogene                                                                                                 | <a href="#">N77263</a>   |
| 142 AA487192::ESTs, Moderately similar to !!!! ALU SUBFAMILY SQ WARNING ENTRY !!!! [H.sapiens]                                                | <a href="#">AA487192</a> |
| 334 AA644657::major histocompatibility complex, class I, A                                                                                    | <a href="#">AA644657</a> |
| 366 H68922::integrin, alpha 1                                                                                                                 | <a href="#">H68922</a>   |
| 309 AA487561::ESTs, Highly similar to RAS-RELATED PROTEIN RAB-1A [M.musculus]                                                                 | <a href="#">AA487561</a> |
| 351 N74623::insulin-like growth factor 2 (somatomedin A)                                                                                      | <a href="#">N74623</a>   |
| 461 H99676::collagen, type VI, alpha 1                                                                                                        | <a href="#">H99676</a>   |
| 386 AA420992::ESTs                                                                                                                            | <a href="#">AA420992</a> |
| 506 AA495981::ESTs                                                                                                                            | <a href="#">AA495981</a> |
| 328 AA497044::ESTs, Highly similar to 3-7 gene product [H.sapiens]                                                                            | <a href="#">AA497044</a> |
| 406 AA398356::ESTs                                                                                                                            | <a href="#">AA398356</a> |
| 417 AA853966::Human mRNA for KIAA0298 gene, complete cds                                                                                      | <a href="#">AA853966</a> |
| 184 H13424::Putative prostate cancer tumor suppressor                                                                                         | <a href="#">H13424</a>   |
| 154 N26665::Human (lambda) DNA for immunoglobulin light chain                                                                                 | <a href="#">N26665</a>   |
| 442 N21338::ESTs, Weakly similar to Enkephalinase analogue polypeptide [H.sapiens]                                                            | <a href="#">N21338</a>   |
| 499 N25883::ESTs                                                                                                                              | <a href="#">N25883</a>   |
| 440 W69995::ESTs                                                                                                                              | <a href="#">W69995</a>   |
| 165 AA701448::ESTs, Weakly similar to T15B7.2 [C.elegans]                                                                                     | <a href="#">AA701448</a> |
| 192 N64734::ESTs                                                                                                                              | <a href="#">N64734</a>   |
| 188 H97146::ESTs, Highly similar to G protein-coupled receptor kinase 6, splice variant B [H.sapiens]                                         | <a href="#">H97146</a>   |
| 396 AA410591::met proto-oncogene (hepatocyte growth factor receptor)                                                                          | <a href="#">AA410591</a> |
| 421 AA436459::nuclear factor I/X (CCAAT-binding transcription factor)                                                                         | <a href="#">AA436459</a> |
| 468 N26108::ESTs                                                                                                                              | <a href="#">N26108</a>   |
| 478 AA485449::ESTs, Weakly similar to small GTP-binding protein Rab36 [H.sapiens]                                                             | <a href="#">AA485449</a> |
| 380 N94616::laminin, alpha 4                                                                                                                  | <a href="#">N94616</a>   |
| 401 AA419608::ESTs, Weakly similar to !!!! ALU SUBFAMILY J WARNING ENTRY !!!! [H.sapiens]                                                     | <a href="#">AA419608</a> |
| 317 AA456376::coagulation factor II (thrombin) receptor                                                                                       | <a href="#">AA456376</a> |
| 438 AA058533::ESTs                                                                                                                            | <a href="#">AA058533</a> |
| 424 T96083::proteasome (prosome, macropain) subunit, alpha type, 4                                                                            | <a href="#">T96083</a>   |
| 273 AA430367::cystathionine-beta-synthase                                                                                                     | <a href="#">AA430367</a> |
| 304 AA418007::ESTs, Highly similar to mitogen-induced [M.musculus]                                                                            | <a href="#">AA418007</a> |
| 358 AA032221::Homo sapiens PAC clone DJ1121E10 from 7q21.1-q21.11                                                                             | <a href="#">AA032221</a> |
| 99 T74567::ESTs                                                                                                                               | <a href="#">T74567</a>   |
| 371 W80701::ESTs, Weakly similar to HERV-E envelope glycoprotein [H.sapiens]                                                                  | <a href="#">W80701</a>   |
| 507 AA458814::ESTs                                                                                                                            | <a href="#">AA458814</a> |
| 460 R94808::ESTs                                                                                                                              | <a href="#">R94808</a>   |
| 514 N98485::forkhead box F2                                                                                                                   | <a href="#">N98485</a>   |
| 402 R49597::ESTs                                                                                                                              | <a href="#">R49597</a>   |
| 448 N64741::slug (chicken homolog), zinc finger protein                                                                                       | <a href="#">N64741</a>   |
| 94 H27864::secretogranin II (chromogranin C)                                                                                                  | <a href="#">H27864</a>   |
| 123 AA151413::EST                                                                                                                             | <a href="#">AA151413</a> |
| 458 T64625::esterase D/formylglutathione hydrolase                                                                                            | <a href="#">T64625</a>   |
| 279 R40481::ESTs, Weakly similar to KIAA0872 protein [H.sapiens]                                                                              | <a href="#">R40481</a>   |
| 295 AA406354::ESTs, Weakly similar to similar to ERG-3 like protein [C.elegans]                                                               | <a href="#">AA406354</a> |
| 404 H94469::ESTs, Weakly similar to cDNA EST EMBL:D36107 comes from this gene [C.elegans]                                                     | <a href="#">H94469</a>   |
| 422 R66310::peptidylglycine alpha-amidating monooxygenase                                                                                     | <a href="#">R66310</a>   |
| 466 AA704802::ESTs                                                                                                                            | <a href="#">AA704802</a> |
| 425 R26756::ESTs                                                                                                                              | <a href="#">R26756</a>   |
| 405 N42770::tyrosinase (oculocutaneous albinism IA)                                                                                           | <a href="#">N42770</a>   |
| 395 W73874::cathepsin L                                                                                                                       | <a href="#">W73874</a>   |

62 R33402::ESTs  
 370 R52965::ESTs  
 400 AA452145::ESTs, Weakly similar to PHOSPHOLIPID HYDROPEROXIDE GLUTATHIONE PEROXIDASE [H.sapiens]  
 387 AA427667::T-cell receptor, alpha (V,D,J,C)  
 382 AA490048::EST  
 469 H94043::DKFZP586I1419 protein  
 491 AA457501::ESTs  
 487 N63635::pim-1 oncogene  
 397 AA598653::osteoblast specific factor 2 (fasciclin I-like)  
 377 N33322::ESTs  
 484 W73810::epithelial membrane protein 3  
 492 H77697::ESTs  
 109 AA449361::ring finger protein 13  
 467 R38459::ESTs  
 450 N66120::ESTs, Highly similar to PROTEIN-TYROSINE PHOSPHATASE DELTA PRECURSOR [H.sapiens]  
 502 AA620401::ESTs  
 508 R28660::ESTs  
 490 N66144::FYN oncogene related to SRC, FGR, YES  
 433 W92703::ESTs

[R33402](#)  
[R52965](#)  
[AA452145](#)  
[AA427667](#)  
[AA490048](#)  
[H94043](#)  
[AA457501](#)  
[N63635](#)  
[AA598653](#)  
[N33322](#)  
[W73810](#)  
[H77697](#)  
[AA449361](#)  
[R38459](#)  
[N66120](#)  
[AA620401](#)  
[R28660](#)  
[N66144](#)  
[W92703](#)

Significant: 385

Median # false significant: 0.08219

### SAM Plot

Delta 0.76345

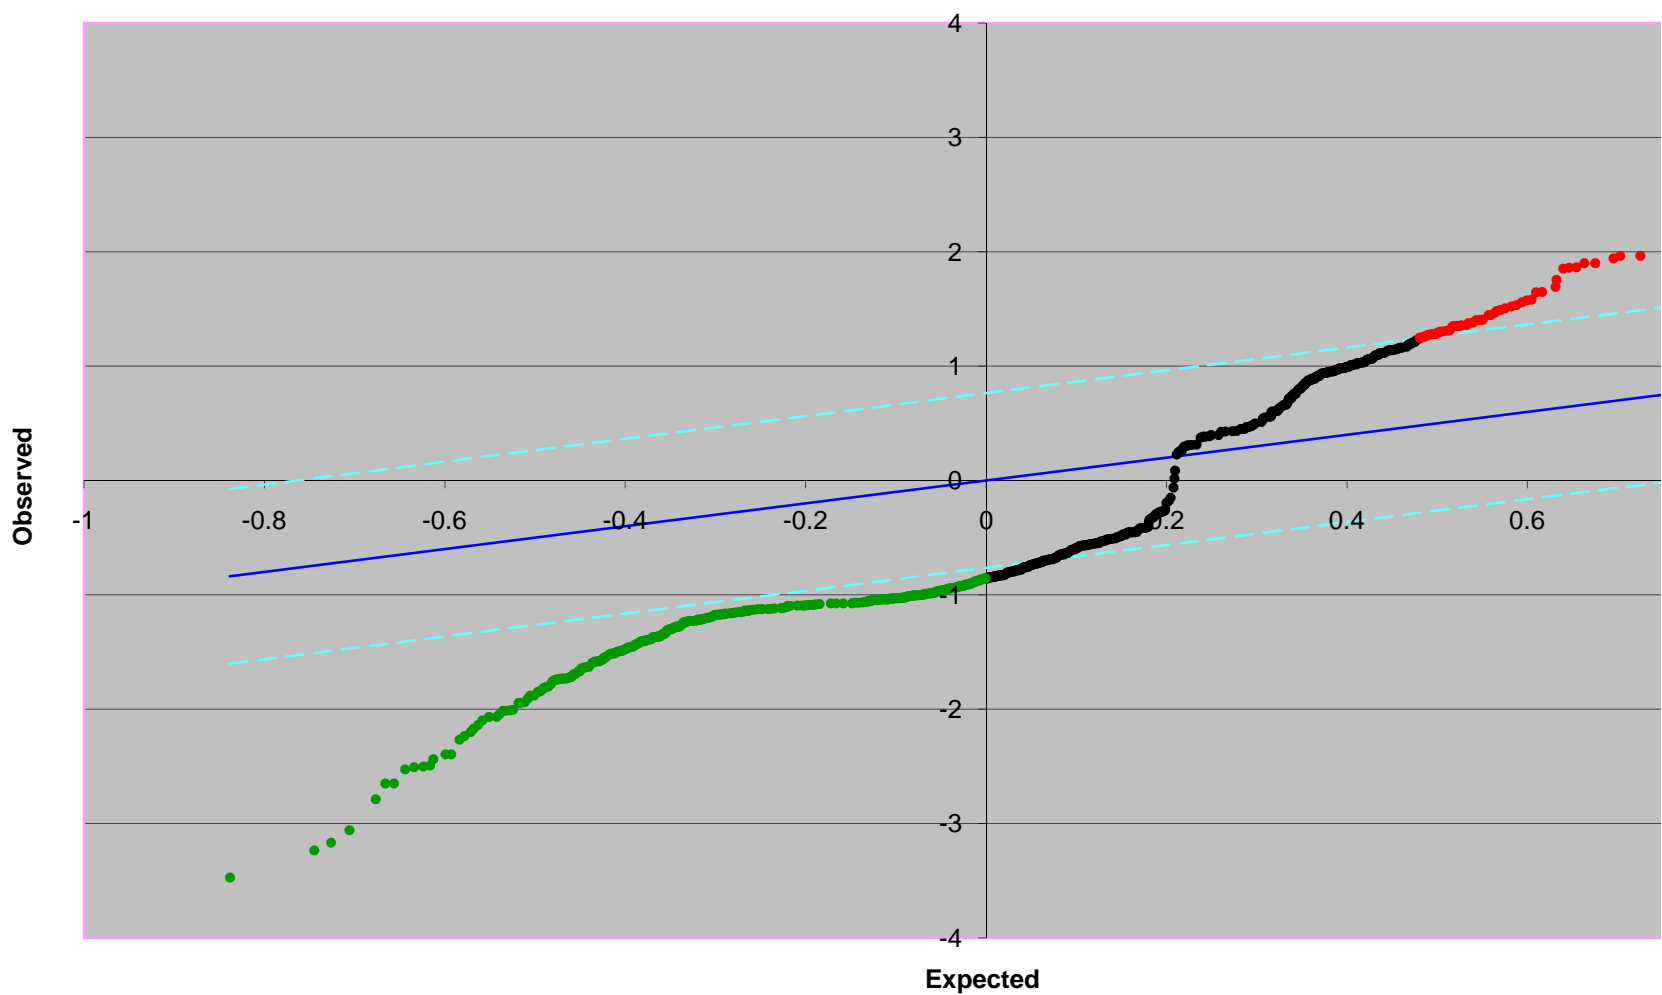

**Row Average Imputer**  
**One class Response**  
**24**  
**FALSE**  
**1234567**  
**0.76345**  
**(1.24861, -0.85642)**

**1.957794763**  
**1**  
**(0.08219, 0.57534)**  
**(0.02135, 0.14944)**  
**0.08219**

| Gene ID                   | Score(d)    | Numerator(r) | Denominator(s+s0) | q-value (%) |
|---------------------------|-------------|--------------|-------------------|-------------|
| <a href="#">W72838</a>    | 2.91773979  | 5.7435       | 1.968475743       | 0.01670565  |
| <a href="#">missing90</a> | 2.217947173 | 4.3775       | 1.973671895       | 0.01670565  |
| <a href="#">H20138</a>    | 2.114505235 | 4.611        | 2.180651967       | 0.01670565  |
| <a href="#">AA478298</a>  | 2.083743498 | 4.3785       | 2.101266305       | 0.01670565  |
| <a href="#">AA155698</a>  | 1.964286379 | 4.1445       | 2.109926559       | 0.01670565  |
| <a href="#">R63647</a>    | 1.963788911 | 4.1015       | 2.088564599       | 0.01670565  |
| <a href="#">AA029598</a>  | 1.942540495 | 3.8945       | 2.00484881        | 0.01670565  |
| <a href="#">AA054078</a>  | 1.901203756 | 4.035        | 2.12233959        | 0.01670565  |
| <a href="#">N48258</a>    | 1.899847968 | 3.759        | 1.978579373       | 0.01670565  |
| <a href="#">W73473</a>    | 1.864211321 | 3.738        | 2.005137485       | 0.01670565  |
| <a href="#">R68997</a>    | 1.860386606 | 3.856        | 2.072687466       | 0.01670565  |
| <a href="#">AA055768</a>  | 1.852279931 | 3.944        | 2.129267793       | 0.01670565  |
| <a href="#">H13688</a>    | 1.755834047 | 3.6175       | 2.060274436       | 0.01670565  |
| <a href="#">AA496148</a>  | 1.693061316 | 3.691        | 2.180074616       | 0.01670565  |
| <a href="#">AA218918</a>  | 1.648256749 | 3.58         | 2.171991713       | 0.01670565  |
| <a href="#">R70505</a>    | 1.644492033 | 3.5685       | 2.169970987       | 0.01670565  |
| <a href="#">N50681</a>    | 1.581877165 | 3.2865       | 2.077594944       | 0.01670565  |
| <a href="#">T95747</a>    | 1.575204678 | 3.1535       | 2.001962058       | 0.01670565  |
| <a href="#">AA485058</a>  | 1.557712021 | 3.0915       | 1.98464155        | 0.01670565  |
| <a href="#">N30553</a>    | 1.53498961  | 3.0145       | 1.963856941       | 0.01670565  |
| <a href="#">W91882</a>    | 1.522120584 | 3.009        | 1.976847322       | 0.01670565  |
| <a href="#">N74131</a>    | 1.506965851 | 3.4145       | 2.265811131       | 0.01670565  |
| <a href="#">R76554</a>    | 1.492640473 | 3.1485       | 2.109349208       | 0.01670565  |
| <a href="#">AA464428</a>  | 1.483907412 | 2.996        | 2.018993891       | 0.01670565  |
| <a href="#">AA453788</a>  | 1.467656009 | 3.0475       | 2.076440243       | 0.01670565  |
| <a href="#">H97778</a>    | 1.447991426 | 2.8495       | 1.967898393       | 0.01670565  |
| <a href="#">H95976</a>    | 1.447290322 | 2.9885       | 2.064893238       | 0.01670565  |
| <a href="#">AA455298</a>  | 1.405409708 | 2.801        | 1.993013129       | 0.01670565  |
| <a href="#">T56316</a>    | 1.404029021 | 2.932        | 2.088275924       | 0.01670565  |
| <a href="#">W51985</a>    | 1.403301156 | 2.8685       | 2.044108628       | 0.01670565  |
| <a href="#">AA456598</a>  | 1.38010114  | 2.89         | 2.094049426       | 0.01670565  |
| <a href="#">R73909</a>    | 1.377287629 | 2.869        | 2.083079771       | 0.01670565  |
| <a href="#">AA495848</a>  | 1.359182028 | 2.887        | 2.12407164        | 0.01670565  |
| <a href="#">W37780</a>    | 1.357925792 | 2.6605       | 1.959238138       | 0.01670565  |
| <a href="#">AA151248</a>  | 1.353009247 | 2.72         | 2.010333637       | 0.01670565  |
| <a href="#">AA136568</a>  | 1.35147909  | 2.706        | 2.002250734       | 0.01670565  |
| <a href="#">T77883</a>    | 1.351054847 | 2.6915       | 1.992147104       | 0.01670565  |
| <a href="#">AA477298</a>  | 1.348503529 | 2.8795       | 2.135329971       | 0.01670565  |
| <a href="#">H01197</a>    | 1.332141942 | 2.7515       | 2.065470588       | 0.01670565  |
| <a href="#">AA453408</a>  | 1.312562824 | 2.96         | 2.255130151       | 0.01670565  |
| <a href="#">H80359</a>    | 1.30914613  | 2.6065       | 1.990992403       | 0.01670565  |
| <a href="#">AA708308</a>  | 1.305153766 | 2.721        | 2.084811822       | 0.01670565  |
| <a href="#">AA262088</a>  | 1.301754622 | 2.6955       | 2.07066674        | 0.01670565  |
| <a href="#">N90806</a>    | 1.294806323 | 2.7155       | 2.097224853       | 0.01670565  |
| <a href="#">R32952</a>    | 1.29404948  | 2.594        | 2.004560135       | 0.01670565  |
| <a href="#">W47576</a>    | 1.286022695 | 2.569        | 1.997631931       | 0.01670565  |
| <a href="#">AA418088</a>  | 1.281974784 | 2.592        | 2.021880643       | 0.01670565  |
| <a href="#">H62594</a>    | 1.281229123 | 2.518        | 1.965300316       | 0.01670565  |
| <a href="#">AA489568</a>  | 1.279795892 | 2.544        | 1.987816977       | 0.01670565  |
| <a href="#">H62594</a>    | 1.276849472 | 2.6255       | 2.056232984       | 0.01670565  |
| <a href="#">AA046428</a>  | 1.270652722 | 2.6355       | 2.074130842       | 0.01670565  |
| <a href="#">H53703</a>    | 1.261555658 | 2.5285       | 2.004271459       | 0.01670565  |
| <a href="#">R76229</a>    | 1.254593987 | 2.47         | 1.968764418       | 0.01670565  |
| <a href="#">AA464258</a>  | 1.250544242 | 2.4595       | 1.966743692       | 0.01670565  |
| <a href="#">AA504128</a>  | 1.248605383 | 2.4665       | 1.975403946       | 0.01670565  |



| Gene ID                   | Score(d)    | Numerator(r) | Denominator(s+s0) | q-value (%) |
|---------------------------|-------------|--------------|-------------------|-------------|
| <a href="#">N68719</a>    | -3.47157164 | -6.971       | 2.008024236       | 0.01670565  |
| <a href="#">H79534</a>    | -3.23278216 | -6.5335      | 2.021014617       | 0.01670565  |
| <a href="#">T90857</a>    | -3.1661171  | -6.2635      | 1.978290697       | 0.01670565  |
| <a href="#">R62612</a>    | -3.05635723 | -6.199       | 2.028231496       | 0.01670565  |
| <a href="#">H93837</a>    | -2.78668983 | -5.932       | 2.128690443       | 0.01670565  |
| <a href="#">R62612</a>    | -2.65008296 | -5.86        | 2.211251531       | 0.01670565  |
| <a href="#">W56586</a>    | -2.64916483 | -5.8725      | 2.216736359       | 0.01670565  |
| <a href="#">H59861</a>    | -2.52623021 | -5.0545      | 2.000807358       | 0.01670565  |
| <a href="#">AA59860</a>   | -2.50654694 | -5.4565      | 2.17689919        | 0.01670565  |
| <a href="#">H95960</a>    | -2.50195626 | -5.2905      | 2.114545361       | 0.01670565  |
| <a href="#">R95691</a>    | -2.49217775 | -4.895       | 1.964145616       | 0.01670565  |
| <a href="#">AA47854</a>   | -2.43644082 | -5.012       | 2.057099009       | 0.01670565  |
| <a href="#">H69531</a>    | -2.39432776 | -4.7505      | 1.9840642         | 0.01670565  |
| <a href="#">N54596</a>    | -2.39381524 | -5.2415      | 2.189600896       | 0.01670565  |
| <a href="#">R11698</a>    | -2.26522255 | -4.4865      | 1.980600098       | 0.01670565  |
| <a href="#">N54596</a>    | -2.23414383 | -4.5965      | 2.057387684       | 0.01670565  |
| <a href="#">N59721</a>    | -2.19937819 | -4.4145      | 2.007158211       | 0.01670565  |
| <a href="#">R60343</a>    | -2.17115528 | -4.366       | 2.010910988       | 0.01670565  |
| <a href="#">T67053</a>    | -2.13805051 | -4.65        | 2.174878464       | 0.01670565  |
| <a href="#">H38240</a>    | -2.09761623 | -4.5445      | 2.166506885       | 0.01670565  |
| <a href="#">H96654</a>    | -2.0688172  | -4.0545      | 1.959815489       | 0.01670565  |
| <a href="#">R45941</a>    | -2.06714904 | -4.3675      | 2.11281331        | 0.01670565  |
| <a href="#">N63943</a>    | -2.04102902 | -4.0295      | 1.974249245       | 0.01670565  |
| <a href="#">AA62043</a>   | -2.01525912 | -5.038       | 2.499926666       | 0.01670565  |
| <a href="#">T62547</a>    | -2.01305905 | -4.026       | 1.999941332       | 0.01670565  |
| <a href="#">R02346</a>    | -2.00965313 | -4.0685      | 2.024478719       | 0.01670565  |
| <a href="#">AA04313</a>   | -2.00701779 | -4.1605      | 2.072976142       | 0.01670565  |
| <a href="#">R17717</a>    | -1.94495079 | -3.91        | 2.010333637       | 0.01670565  |
| <a href="#">R01937</a>    | -1.94424899 | -4.3155      | 2.21962311        | 0.01670565  |
| <a href="#">AA45396</a>   | -1.93878026 | -3.8545      | 1.988105652       | 0.01670565  |
| <a href="#">H99415</a>    | -1.90678417 | -3.743       | 1.962990915       | 0.01670565  |
| <a href="#">AA23380</a>   | -1.8813358  | -3.8185      | 2.029674871       | 0.01670565  |
| <a href="#">AA03937</a>   | -1.88095459 | -3.8275      | 2.034871024       | 0.01670565  |
| <a href="#">H68848</a>    | -1.84832217 | -3.7675      | 2.038335125       | 0.01670565  |
| <a href="#">AA28290</a>   | -1.84495634 | -3.693       | 2.001673383       | 0.01670565  |
| <a href="#">W81128</a>    | -1.83444536 | -3.7085      | 2.021591968       | 0.01670565  |
| <a href="#">H09461</a>    | -1.82835302 | -3.949       | 2.159867357       | 0.01670565  |
| <a href="#">missing51</a> | -1.81181337 | -4.066       | 2.244160496       | 0.01670565  |
| <a href="#">AA05583</a>   | -1.8044958  | -3.811       | 2.111947285       | 0.01670565  |
| <a href="#">AA77587</a>   | -1.80171113 | -3.9055      | 2.167661586       | 0.01670565  |
| <a href="#">AA48259</a>   | -1.78463848 | -4.0045      | 2.243871821       | 0.01670565  |
| <a href="#">W45275</a>    | -1.75590884 | -4.1215      | 2.347217519       | 0.01670565  |
| <a href="#">AA39947</a>   | -1.74659845 | -3.962       | 2.268409208       | 0.01670565  |
| <a href="#">N91921</a>    | -1.74065161 | -3.4405      | 1.976558647       | 0.01670565  |
| <a href="#">AA63399</a>   | -1.74036974 | -3.5565      | 2.043531278       | 0.01670565  |
| <a href="#">AA48781</a>   | -1.7401201  | -3.666       | 2.106751132       | 0.01670565  |
| <a href="#">AA08647</a>   | -1.73405521 | -3.4605      | 1.995611205       | 0.01670565  |
| <a href="#">R93124</a>    | -1.73255256 | -3.453       | 1.993013129       | 0.01670565  |
| <a href="#">AA11210</a>   | -1.73254646 | -3.4955      | 2.017550516       | 0.01670565  |
| <a href="#">AA68307</a>   | -1.73253802 | -3.556       | 2.052480207       | 0.01670565  |
| <a href="#">T97889</a>    | -1.72796999 | -3.3875      | 1.960392839       | 0.01670565  |
| <a href="#">AA05594</a>   | -1.71944816 | -4.2295      | 2.459800822       | 0.01670565  |
| <a href="#">T56948</a>    | -1.71725511 | -3.598       | 2.095204127       | 0.01670565  |
| <a href="#">AA27907</a>   | -1.70416104 | -3.544       | 2.07961567        | 0.01670565  |
| <a href="#">H86554</a>    | -1.69333172 | -3.3675      | 1.988683002       | 0.01670565  |
| <a href="#">AA28213</a>   | -1.68934716 | -3.6395      | 2.154382529       | 0.01670565  |
| <a href="#">N26285</a>    | -1.6710861  | -3.8375      | 2.296410696       | 0.01670565  |
| <a href="#">T89996</a>    | -1.66695698 | -3.3035      | 1.981754799       | 0.01670565  |
| <a href="#">H26271</a>    | -1.64579568 | -3.4345      | 2.086832548       | 0.01670565  |
| <a href="#">AA43647</a>   | -1.63757088 | -3.3625      | 2.053346232       | 0.01670565  |
| <a href="#">R92216</a>    | -1.63683464 | -3.335       | 2.0374691         | 0.01670565  |
| <a href="#">AA67816</a>   | -1.63240253 | -3.391       | 2.077306269       | 0.01670565  |
| <a href="#">H23978</a>    | -1.62832957 | -3.4695      | 2.130711168       | 0.01670565  |
| <a href="#">AA40029</a>   | -1.59405336 | -3.4885      | 2.188446195       | 0.01670565  |
| <a href="#">Missing1f</a> | -1.58973565 | -3.3735      | 2.122050914       | 0.01670565  |
| <a href="#">N34436</a>    | -1.58588421 | -3.396       | 2.141392148       | 0.01670565  |
| <a href="#">T77595</a>    | -1.58356025 | -3.114       | 1.966455017       | 0.01670565  |
| <a href="#">AA04652</a>   | -1.5813749  | -3.285       | 2.077306269       | 0.01670565  |
| <a href="#">H64380</a>    | -1.58101074 | -3.381       | 2.138505397       | 0.01670565  |
| <a href="#">H10068</a>    | -1.57014879 | -3.1325      | 1.995033855       | 0.01670565  |
| <a href="#">SSH121e</a>   | -1.56458924 | -3.3915      | 2.167661586       | 0.01670565  |
| <a href="#">AA15053</a>   | -1.54986103 | -3.105       | 2.003405434       | 0.01670565  |
| <a href="#">T53220</a>    | -1.54721025 | -3.2645      | 2.109926559       | 0.01670565  |
| <a href="#">AA77544</a>   | -1.54183515 | -3.2585      | 2.11339066        | 0.01670565  |
| <a href="#">W49672</a>    | -1.52154152 | -3.108       | 2.042665252       | 0.01670565  |
| <a href="#">AA09915</a>   | -1.51618005 | -3.28        | 2.163331459       | 0.01670565  |
| <a href="#">N73836</a>    | -1.51467595 | -3.052       | 2.014952439       | 0.01670565  |

|                          |             |         |             |            |
|--------------------------|-------------|---------|-------------|------------|
| <a href="#">H14231</a>   | -1.51270267 | -3.0275 | 2.001384708 | 0.01670565 |
| <a href="#">AA70673</a>  | -1.51084381 | -3.0735 | 2.034293673 | 0.01670565 |
| <a href="#">AA86237</a>  | -1.50413654 | -3.082  | 2.049016105 | 0.01670565 |
| <a href="#">R62603</a>   | -1.49799675 | -2.9505 | 1.969630443 | 0.01670565 |
| <a href="#">AA77561</a>  | -1.49736529 | -3.758  | 2.50974162  | 0.01670565 |
| <a href="#">R37411</a>   | -1.49100533 | -3.2165 | 2.157269281 | 0.01670565 |
| <a href="#">AA28469</a>  | -1.4885436  | -3.1665 | 2.127247067 | 0.01670565 |
| <a href="#">H17550</a>   | -1.48831838 | -3.0715 | 2.063738537 | 0.01670565 |
| <a href="#">AA48862</a>  | -1.47895221 | -3.4885 | 2.358764525 | 0.01670565 |
| <a href="#">T98352</a>   | -1.47653274 | -3.184  | 2.156403255 | 0.01670565 |
| <a href="#">AA44933</a>  | -1.47507286 | -3.0365 | 2.058542385 | 0.01670565 |
| <a href="#">W69134</a>   | -1.46496004 | -2.9015 | 1.980600098 | 0.01670565 |
| <a href="#">AA70087</a>  | -1.46078413 | -3.3495 | 2.292946594 | 0.01670565 |
| <a href="#">AA68229</a>  | -1.45975919 | -3.0665 | 2.100688954 | 0.01670565 |
| <a href="#">AA19498</a>  | -1.45844177 | -3.3155 | 2.273316685 | 0.01670565 |
| <a href="#">AA06357</a>  | -1.45584167 | -2.8515 | 1.958660788 | 0.01670565 |
| <a href="#">AA42594</a>  | -1.45243938 | -3.018  | 2.077883619 | 0.01670565 |
| <a href="#">AA22759</a>  | -1.44238366 | -2.908  | 2.01610714  | 0.01670565 |
| <a href="#">missing2</a> | -1.43262457 | -2.976  | 2.077306269 | 0.01670565 |
| <a href="#">N67039</a>   | -1.43000108 | -2.869  | 2.006292185 | 0.01670565 |
| <a href="#">H87471</a>   | -1.42288747 | -2.8995 | 2.037757775 | 0.01670565 |
| <a href="#">AA04350</a>  | -1.41755856 | -3.0245 | 2.13359792  | 0.01670565 |
| <a href="#">H15662</a>   | -1.41638995 | -2.948  | 2.08134772  | 0.01670565 |
| <a href="#">AA49687</a>  | -1.4104122  | -2.881  | 2.042665252 | 0.01670565 |
| <a href="#">T68892</a>   | -1.40563756 | -3.0015 | 2.135329971 | 0.01670565 |
| <a href="#">AA29207</a>  | -1.40488315 | -3.1175 | 2.21904576  | 0.01670565 |
| <a href="#">R97220</a>   | -1.4037536  | -2.852  | 2.031695597 | 0.01670565 |
| <a href="#">R22977</a>   | -1.39524198 | -2.7465 | 1.968475743 | 0.01670565 |
| <a href="#">H80685</a>   | -1.39320995 | -2.7425 | 1.968475743 | 0.01670565 |
| <a href="#">AA13670</a>  | -1.39297083 | -2.9455 | 2.114545361 | 0.01670565 |
| <a href="#">H58644</a>   | -1.39107792 | -2.7375 | 1.967898393 | 0.01670565 |
| <a href="#">R10382</a>   | -1.3829553  | -2.781  | 2.010910988 | 0.01670565 |
| <a href="#">AA44752</a>  | -1.37326885 | -2.775  | 2.020725942 | 0.01670565 |
| <a href="#">AA25839</a>  | -1.37325798 | -2.706  | 1.970496469 | 0.01670565 |
| <a href="#">AA63375</a>  | -1.36729017 | -3.04   | 2.223375887 | 0.01670565 |
| <a href="#">R92227</a>   | -1.36706023 | -2.6855 | 1.964434291 | 0.01670565 |
| <a href="#">N93505</a>   | -1.36704801 | -2.794  | 2.043819953 | 0.01670565 |
| <a href="#">H99816</a>   | -1.36677194 | -2.825  | 2.066913964 | 0.01670565 |
| <a href="#">T82817</a>   | -1.36541595 | -2.741  | 2.007446886 | 0.01670565 |
| <a href="#">AA48537</a>  | -1.36465244 | -3.2575 | 2.387054688 | 0.01670565 |
| <a href="#">AA10252</a>  | -1.3639297  | -2.827  | 2.072687466 | 0.01670565 |
| <a href="#">N21633</a>   | -1.36187178 | -2.7445 | 2.015241115 | 0.01670565 |
| <a href="#">W86431</a>   | -1.35645415 | -2.835  | 2.090007974 | 0.01670565 |
| <a href="#">R42177</a>   | -1.34668773 | -3.2325 | 2.400333744 | 0.01670565 |
| <a href="#">N47524</a>   | -1.34177718 | -2.7745 | 2.067779989 | 0.01670565 |
| <a href="#">AA45456</a>  | -1.34073563 | -2.717  | 2.026499445 | 0.01670565 |
| <a href="#">W73144</a>   | -1.33794649 | -2.665  | 1.991858429 | 0.01670565 |
| <a href="#">AA63356</a>  | -1.32597191 | -2.88   | 2.171991713 | 0.01670565 |
| <a href="#">AA15962</a>  | -1.31294798 | -2.7255 | 2.075862893 | 0.01670565 |
| <a href="#">T48949</a>   | -1.30659207 | -2.681  | 2.051902857 | 0.01670565 |
| <a href="#">AA45647</a>  | -1.30375527 | -2.8675 | 2.19941585  | 0.01670565 |
| <a href="#">AA70186</a>  | -1.29969385 | -2.973  | 2.287461767 | 0.01670565 |
| <a href="#">N52362</a>   | -1.29949925 | -2.818  | 2.168527611 | 0.01670565 |
| <a href="#">W74668</a>   | -1.29800292 | -2.6645 | 2.052768882 | 0.01670565 |
| <a href="#">AA01168</a>  | -1.29576846 | -2.6255 | 2.02621077  | 0.01670565 |
| <a href="#">AA25623</a>  | -1.29172048 | -2.5375 | 1.964434291 | 0.01670565 |
| <a href="#">AA48784</a>  | -1.28714803 | -2.5575 | 1.986950951 | 0.01670565 |
| <a href="#">H15718</a>   | -1.28492426 | -2.5605 | 1.992724454 | 0.01670565 |
| <a href="#">AA41839</a>  | -1.27947465 | -2.567  | 2.006292185 | 0.01670565 |
| <a href="#">AA43179</a>  | -1.27824418 | -2.8815 | 2.254264126 | 0.01670565 |
| <a href="#">R43605</a>   | -1.27806868 | -2.697  | 2.110215234 | 0.01670565 |
| <a href="#">AA49023</a>  | -1.27719399 | -2.558  | 2.002828084 | 0.01670565 |
| <a href="#">AA43157</a>  | -1.27670785 | -2.63   | 2.05998576  | 0.01670565 |
| <a href="#">R06634</a>   | -1.27180391 | -2.907  | 2.285729716 | 0.01670565 |
| <a href="#">AA86338</a>  | -1.2659891  | -2.9065 | 2.295833345 | 0.01670565 |
| <a href="#">H23235</a>   | -1.25646256 | -2.597  | 2.066913964 | 0.01670565 |
| <a href="#">N39240</a>   | -1.24255295 | -2.5765 | 2.073553492 | 0.01670565 |
| <a href="#">AA48789</a>  | -1.24073572 | -2.442  | 1.968187068 | 0.01670565 |
| <a href="#">R09069</a>   | -1.24031167 | -2.6585 | 2.143412874 | 0.01670565 |
| <a href="#">H57052</a>   | -1.23853359 | -2.482  | 2.003982784 | 0.01670565 |
| <a href="#">AA47978</a>  | -1.2325086  | -2.5635 | 2.079904345 | 0.01670565 |
| <a href="#">N40975</a>   | -1.22908012 | -2.5365 | 2.063738537 | 0.01670565 |
| <a href="#">N77198</a>   | -1.22831578 | -2.4945 | 2.030829572 | 0.01670565 |
| <a href="#">T80932</a>   | -1.22726636 | -2.5115 | 2.046418029 | 0.01670565 |
| <a href="#">AA40654</a>  | -1.22620874 | -2.475  | 2.018416541 | 0.01670565 |
| <a href="#">AA47716</a>  | -1.22208741 | -2.545  | 2.082502421 | 0.01670565 |
| <a href="#">AA29157</a>  | -1.21699035 | -2.4715 | 2.030829572 | 0.01670565 |
| <a href="#">AA29367</a>  | -1.21629529 | -2.521  | 2.072687466 | 0.01670565 |

|                         |             |         |             |            |
|-------------------------|-------------|---------|-------------|------------|
| <a href="#">AA17342</a> | -1.21599198 | -2.4105 | 1.982332149 | 0.01670565 |
| <a href="#">R59724</a>  | -1.21528217 | -2.4975 | 2.055078283 | 0.01670565 |
| <a href="#">AA15026</a> | -1.21406839 | -2.4165 | 1.990415053 | 0.01670565 |
| <a href="#">AA29116</a> | -1.21157736 | -2.4    | 1.980888774 | 0.01670565 |
| <a href="#">R33755</a>  | -1.20852906 | -2.4285 | 2.009467612 | 0.01670565 |
| <a href="#">AA48628</a> | -1.20631292 | -2.384  | 1.976269971 | 0.01670565 |
| <a href="#">N74889</a>  | -1.20318033 | -2.5025 | 2.079904345 | 0.01670565 |
| <a href="#">AA62037</a> | -1.20171914 | -2.5175 | 2.094915452 | 0.01670565 |
| <a href="#">AA45986</a> | -1.19702586 | -2.4275 | 2.027942821 | 0.01670565 |
| <a href="#">AA48963</a> | -1.19245036 | -2.506  | 2.10155498  | 0.01670565 |
| <a href="#">R52339</a>  | -1.17982333 | -2.489  | 2.109637884 | 0.01670565 |
| <a href="#">AA66847</a> | -1.17520267 | -2.3215 | 1.975403946 | 0.01670565 |
| <a href="#">AA59879</a> | -1.17487362 | -2.349  | 1.999363982 | 0.01670565 |
| <a href="#">R88506</a>  | -1.17266857 | -2.306  | 1.966455017 | 0.01670565 |
| <a href="#">R37566</a>  | -1.17116823 | -2.7855 | 2.378394434 | 0.01670565 |
| <a href="#">AA17375</a> | -1.16930525 | -2.3085 | 1.974249245 | 0.01670565 |
| <a href="#">AA23307</a> | -1.16926691 | -2.3145 | 1.979445398 | 0.01670565 |
| <a href="#">AA59909</a> | -1.16479136 | -2.501  | 2.147165651 | 0.01670565 |
| <a href="#">N67770</a>  | -1.16471061 | -2.521  | 2.164486159 | 0.01670565 |
| <a href="#">AA88489</a> | -1.16136258 | -2.4115 | 2.076440243 | 0.01670565 |
| <a href="#">AA44797</a> | -1.16044532 | -2.424  | 2.088853274 | 0.01670565 |
| <a href="#">H91680</a>  | -1.15797032 | -2.479  | 2.140814798 | 0.01670565 |
| <a href="#">H09748</a>  | -1.15228687 | -2.387  | 2.071532766 | 0.01670565 |
| <a href="#">H20717</a>  | -1.14955542 | -2.2715 | 1.975981296 | 0.01670565 |
| <a href="#">N73091</a>  | -1.14879371 | -2.269  | 1.975115271 | 0.01670565 |
| <a href="#">AA40655</a> | -1.14707647 | -2.4825 | 2.164197484 | 0.01670565 |
| <a href="#">H95348</a>  | -1.14007466 | -2.2995 | 2.016973165 | 0.01670565 |
| <a href="#">H10192</a>  | -1.1397137  | -2.3955 | 2.101843655 | 0.01670565 |
| <a href="#">N26562</a>  | -1.13941629 | -2.311  | 2.028231496 | 0.01670565 |
| <a href="#">AA44311</a> | -1.13870462 | -2.4085 | 2.115122711 | 0.01670565 |
| <a href="#">AA93679</a> | -1.13769464 | -2.23   | 1.960104164 | 0.01670565 |
| <a href="#">R92801</a>  | -1.13410405 | -2.331  | 2.055366958 | 0.01670565 |
| <a href="#">N51499</a>  | -1.13013669 | -2.8295 | 2.503679442 | 0.01670565 |
| <a href="#">T83821</a>  | -1.12627663 | -2.285  | 2.028808846 | 0.01670565 |
| <a href="#">AA48608</a> | -1.12463284 | -2.2255 | 1.978868048 | 0.01670565 |
| <a href="#">W01240</a>  | -1.12444883 | -2.3355 | 2.077017593 | 0.01670565 |
| <a href="#">R66057</a>  | -1.12182031 | -2.2575 | 2.012354363 | 0.01670565 |
| <a href="#">R71124</a>  | -1.12004933 | -2.198  | 1.962413565 | 0.01670565 |
| <a href="#">AA45865</a> | -1.11622216 | -2.2385 | 2.00542616  | 0.01670565 |
| <a href="#">AA49077</a> | -1.11583604 | -2.45   | 2.195663074 | 0.01670565 |
| <a href="#">AA45639</a> | -1.11357049 | -2.184  | 1.961258864 | 0.01670565 |
| <a href="#">AA12706</a> | -1.10485263 | -2.246  | 2.032850298 | 0.01670565 |
| <a href="#">AA77525</a> | -1.09797044 | -2.8225 | 2.570652074 | 0.01670565 |
| <a href="#">AA70468</a> | -1.09730487 | -2.479  | 2.259171603 | 0.01670565 |
| <a href="#">R09561</a>  | -1.09527087 | -2.3375 | 2.13417527  | 0.01670565 |
| <a href="#">H05445</a>  | -1.0951951  | -2.227  | 2.033427648 | 0.01670565 |
| <a href="#">H57309</a>  | -1.09282659 | -2.1695 | 1.985218901 | 0.01670565 |
| <a href="#">AA14852</a> | -1.09244632 | -2.369  | 2.168527611 | 0.01670565 |
| <a href="#">AA46106</a> | -1.08832647 | -2.2655 | 2.081636396 | 0.01670565 |
| <a href="#">W01011</a>  | -1.08760216 | -2.145  | 1.97222852  | 0.01670565 |
| <a href="#">AA13718</a> | -1.08460102 | -2.6535 | 2.446521766 | 0.01670565 |
| <a href="#">AA62046</a> | -1.08319969 | -2.1285 | 1.965011641 | 0.01670565 |
| <a href="#">AA59881</a> | -1.07920089 | -2.187  | 2.026499445 | 0.01670565 |
| <a href="#">T53298</a>  | -1.07552616 | -2.2165 | 2.060851786 | 0.01670565 |
| <a href="#">H46553</a>  | -1.07423195 | -2.265  | 2.108483183 | 0.01670565 |
| <a href="#">AA00161</a> | -1.07377419 | -2.207  | 2.055366958 | 0.01670565 |
| <a href="#">AA22813</a> | -1.0736308  | -2.141  | 1.99416783  | 0.01670565 |
| <a href="#">AA48860</a> | -1.06848448 | -2.0965 | 1.96212489  | 0.01670565 |
| <a href="#">AA43656</a> | -1.06793201 | -2.359  | 2.20894213  | 0.01670565 |
| <a href="#">R26163</a>  | -1.06537647 | -2.2085 | 2.072976142 | 0.01670565 |
| <a href="#">N20407</a>  | -1.06417356 | -2.21   | 2.076728918 | 0.01670565 |
| <a href="#">AA49628</a> | -1.06243138 | -2.253  | 2.120607539 | 0.01670565 |
| <a href="#">AA16946</a> | -1.06209971 | -2.1735 | 2.046418029 | 0.01670565 |
| <a href="#">AA85802</a> | -1.05564497 | -2.2895 | 2.168816286 | 0.01670565 |
| <a href="#">AA49017</a> | -1.05553732 | -2.395  | 2.268986558 | 0.01670565 |
| <a href="#">AA28719</a> | -1.05367867 | -2.1295 | 2.021014617 | 0.01670565 |
| <a href="#">AA45754</a> | -1.04745566 | -2.0885 | 1.993879155 | 0.01670565 |
| <a href="#">R76553</a>  | -1.04640695 | -2.158  | 2.062295162 | 0.01670565 |
| <a href="#">R56916</a>  | -1.04640068 | -2.1015 | 2.008312911 | 0.01670565 |
| <a href="#">AA13146</a> | -1.04575705 | -2.083  | 1.991858429 | 0.01670565 |
| <a href="#">AA17205</a> | -1.04496417 | -2.187  | 2.092894726 | 0.01670565 |
| <a href="#">AA60942</a> | -1.04230704 | -2.1005 | 2.015241115 | 0.01670565 |
| <a href="#">R76614</a>  | -1.04080151 | -2.12   | 2.03689175  | 0.01670565 |
| <a href="#">AA67020</a> | -1.04061244 | -2.259  | 2.170837012 | 0.01670565 |
| <a href="#">AA49600</a> | -1.04011318 | -2.121  | 2.039201151 | 0.01670565 |
| <a href="#">AA41875</a> | -1.03992459 | -2.0975 | 2.016973165 | 0.01670565 |
| <a href="#">N62244</a>  | -1.03963839 | -2.039  | 1.961258864 | 0.01670565 |
| <a href="#">R11047</a>  | -1.03783407 | -2.081  | 2.005137485 | 0.01670565 |

|                         |             |         |             |            |
|-------------------------|-------------|---------|-------------|------------|
| <a href="#">AA45506</a> | -1.03455339 | -2.035  | 1.967032367 | 0.01670565 |
| <a href="#">T89391</a>  | -1.03368713 | -2.0885 | 2.020437267 | 0.01670565 |
| <a href="#">T95274</a>  | -1.03296557 | -2.0775 | 2.011199663 | 0.01670565 |
| <a href="#">AA28466</a> | -1.03253347 | -2.251  | 2.180074616 | 0.01670565 |
| <a href="#">AA16471</a> | -1.03180811 | -2.113  | 2.047861405 | 0.01670565 |
| <a href="#">R78530</a>  | -1.03119267 | -2.104  | 2.040355851 | 0.01670565 |
| <a href="#">AA49695</a> | -1.03083566 | -2.0875 | 2.025056069 | 0.01670565 |
| <a href="#">H73724</a>  | -1.02906208 | -2.105  | 2.045552004 | 0.01670565 |
| <a href="#">R10378</a>  | -1.02893419 | -2.2185 | 2.15611458  | 0.01670565 |
| <a href="#">N22980</a>  | -1.02616969 | -2.0585 | 2.00600351  | 0.01670565 |
| <a href="#">N62638</a>  | -1.0253414  | -2.008  | 1.958372113 | 0.01670565 |
| <a href="#">N52517</a>  | -1.02497722 | -2.2005 | 2.146876976 | 0.01670565 |
| <a href="#">W70343</a>  | -1.02410753 | -2.167  | 2.115988737 | 0.01670565 |
| <a href="#">AA44774</a> | -1.02062394 | -2.0515 | 2.010044962 | 0.01670565 |
| <a href="#">H63077</a>  | -1.01599655 | -2.0815 | 2.04872743  | 0.01670565 |
| <a href="#">AA15674</a> | -1.01155024 | -1.988  | 1.965300316 | 0.01670565 |
| <a href="#">AA44973</a> | -1.01038406 | -1.9965 | 1.975981296 | 0.01670565 |
| <a href="#">AA17178</a> | -1.01021807 | -2.0335 | 2.012931714 | 0.01670565 |
| <a href="#">N32295</a>  | -1.00999129 | -2.038  | 2.017839191 | 0.01670565 |
| <a href="#">R83836</a>  | -1.00466354 | -2.0345 | 2.025056069 | 0.01670565 |
| <a href="#">AA43226</a> | -1.00464321 | -2.0565 | 2.046995379 | 0.01670565 |
| <a href="#">AA68357</a> | -1.00461166 | -2.2635 | 2.253109426 | 0.01670565 |
| <a href="#">R98628</a>  | -1.00425178 | -1.9925 | 1.9840642   | 0.01670565 |
| <a href="#">N24076</a>  | -1.00274295 | -2.2645 | 2.258305578 | 0.01670565 |
| <a href="#">T95151</a>  | -1.00143487 | -2.019  | 2.01610714  | 0.01670565 |
| <a href="#">AA70422</a> | -0.99785009 | -1.987  | 1.991281078 | 0.01670565 |
| <a href="#">R38539</a>  | -0.9937609  | -2.1025 | 2.115700061 | 0.01670565 |
| <a href="#">H73479</a>  | -0.99291681 | -2.2125 | 2.228283364 | 0.01670565 |
| <a href="#">N77263</a>  | -0.99125417 | -2.062  | 2.08019302  | 0.01670565 |
| <a href="#">AA48719</a> | -0.9908803  | -1.992  | 2.010333637 | 0.01670565 |
| <a href="#">AA64465</a> | -0.98740732 | -1.9625 | 1.987528302 | 0.01670565 |
| <a href="#">H68922</a>  | -0.98686117 | -2.299  | 2.329608336 | 0.01670565 |
| <a href="#">AA48756</a> | -0.98573386 | -2.0195 | 2.04872743  | 0.01670565 |
| <a href="#">N74623</a>  | -0.98358081 | -2.1775 | 2.213849607 | 0.01670565 |
| <a href="#">H99676</a>  | -0.98156555 | -2.1005 | 2.139948773 | 0.01670565 |
| <a href="#">AA42099</a> | -0.98144229 | -2.1535 | 2.194219698 | 0.01670565 |
| <a href="#">AA49598</a> | -0.9806315  | -2.1755 | 2.218468409 | 0.01670565 |
| <a href="#">AA49704</a> | -0.97234494 | -1.98   | 2.036314399 | 0.01670565 |
| <a href="#">AA39835</a> | -0.97145146 | -2.0295 | 2.089141949 | 0.01670565 |
| <a href="#">AA85396</a> | -0.97039592 | -2.0385 | 2.100688954 | 0.01670565 |
| <a href="#">H13424</a>  | -0.96583395 | -1.9765 | 2.046418029 | 0.01670565 |
| <a href="#">N26665</a>  | -0.96423703 | -1.9415 | 2.013509064 | 0.01670565 |
| <a href="#">N21338</a>  | -0.96251654 | -2.4115 | 2.505411493 | 0.01670565 |
| <a href="#">N25883</a>  | -0.96230127 | -2.104  | 2.186425469 | 0.01670565 |
| <a href="#">W69995</a>  | -0.96104007 | -2.382  | 2.478564706 | 0.01670565 |
| <a href="#">AA70144</a> | -0.96020458 | -1.9295 | 2.009467612 | 0.01670565 |
| <a href="#">N64734</a>  | -0.95806615 | -1.9335 | 2.018127866 | 0.01670565 |
| <a href="#">H97146</a>  | -0.95597015 | -1.945  | 2.034582349 | 0.01670565 |
| <a href="#">AA41059</a> | -0.95023676 | -2.0565 | 2.164197484 | 0.01670565 |
| <a href="#">AA43645</a> | -0.94865644 | -2.0005 | 2.108771858 | 0.01670565 |
| <a href="#">N26108</a>  | -0.94481923 | -2.0055 | 2.122628265 | 0.01670565 |
| <a href="#">AA48544</a> | -0.94376785 | -2.0425 | 2.164197484 | 0.01670565 |
| <a href="#">N94616</a>  | -0.94327539 | -1.9995 | 2.119741513 | 0.01670565 |
| <a href="#">AA41960</a> | -0.94270098 | -1.961  | 2.08019302  | 0.01670565 |
| <a href="#">AA45637</a> | -0.94073599 | -1.9045 | 2.024478719 | 0.01670565 |
| <a href="#">AA05853</a> | -0.94000361 | -2.446  | 2.602117663 | 0.01670565 |
| <a href="#">T96083</a>  | -0.93893758 | -1.9735 | 2.101843655 | 0.01670565 |
| <a href="#">AA43036</a> | -0.93743028 | -1.943  | 2.072687466 | 0.01670565 |
| <a href="#">AA41800</a> | -0.93659406 | -1.9145 | 2.044108628 | 0.01670565 |
| <a href="#">AA03222</a> | -0.93336071 | -2.1    | 2.249933999 | 0.01670565 |
| <a href="#">T74567</a>  | -0.9296992  | -2.2595 | 2.430355958 | 0.01670565 |
| <a href="#">W80701</a>  | -0.92755143 | -1.99   | 2.1454336   | 0.01670565 |
| <a href="#">AA45881</a> | -0.92744165 | -2.0575 | 2.218468409 | 0.01670565 |
| <a href="#">R94808</a>  | -0.92665305 | -1.9755 | 2.131865869 | 0.01670565 |
| <a href="#">N98485</a>  | -0.92301257 | -2.057  | 2.228572039 | 0.01670565 |
| <a href="#">R49597</a>  | -0.92261812 | -1.9115 | 2.071821441 | 0.01670565 |
| <a href="#">N64741</a>  | -0.92251671 | -2.2005 | 2.385322637 | 0.01670565 |
| <a href="#">H27864</a>  | -0.92046607 | -2.198  | 2.387920713 | 0.01670565 |
| <a href="#">AA15141</a> | -0.91660601 | -2.7699 | 3.021909044 | 0.01670565 |
| <a href="#">T64625</a>  | -0.91509    | -1.949  | 2.129845143 | 0.01670565 |
| <a href="#">R40481</a>  | -0.90974942 | -1.883  | 2.069800715 | 0.01670565 |
| <a href="#">AA40635</a> | -0.90870905 | -1.8575 | 2.044108628 | 0.01670565 |
| <a href="#">H94469</a>  | -0.90859316 | -1.889  | 2.079038319 | 0.01670565 |
| <a href="#">R66310</a>  | -0.90769311 | -1.917  | 2.111947285 | 0.01670565 |
| <a href="#">AA70480</a> | -0.90598493 | -1.9215 | 2.120896214 | 0.01670565 |
| <a href="#">R26756</a>  | -0.9039483  | -1.895  | 2.096358827 | 0.01670565 |
| <a href="#">N42770</a>  | -0.9020393  | -1.866  | 2.068646015 | 0.01670565 |
| <a href="#">W73874</a>  | -0.90019987 | -1.9295 | 2.143412874 | 0.01670565 |

|                         |             |         |             |            |
|-------------------------|-------------|---------|-------------|------------|
| <a href="#">R33402</a>  | -0.89556599 | -2.395  | 2.674286447 | 0.01670565 |
| <a href="#">R52965</a>  | -0.89157257 | -1.902  | 2.133309245 | 0.01670565 |
| <a href="#">AA45214</a> | -0.88989839 | -1.8545 | 2.083945797 | 0.01670565 |
| <a href="#">AA42766</a> | -0.88850909 | -1.9265 | 2.168238936 | 0.01670565 |
| <a href="#">AA49004</a> | -0.88140984 | -1.862  | 2.112524635 | 0.01670565 |
| <a href="#">H94043</a>  | -0.88086348 | -1.87   | 2.12291694  | 0.01670565 |
| <a href="#">AA45750</a> | -0.88081652 | -1.9205 | 2.180363292 | 0.01670565 |
| <a href="#">N63635</a>  | -0.87841081 | -1.844  | 2.099245579 | 0.01670565 |
| <a href="#">AA59865</a> | -0.87569321 | -1.8795 | 2.146299626 | 0.01670565 |
| <a href="#">N33322</a>  | -0.8724874  | -1.8565 | 2.127824417 | 0.01670565 |
| <a href="#">W73810</a>  | -0.87140741 | -1.8215 | 2.09029665  | 0.01670565 |
| <a href="#">H77697</a>  | -0.86969306 | -1.897  | 2.181229317 | 0.01670565 |
| <a href="#">AA44936</a> | -0.86391663 | -2.7858 | 3.224616723 | 0.01670565 |
| <a href="#">R38459</a>  | -0.86237427 | -1.8305 | 2.122628265 | 0.01670565 |
| <a href="#">N66120</a>  | -0.86124793 | -1.983  | 2.302472874 | 0.01670565 |
| <a href="#">AA62040</a> | -0.85956597 | -1.863  | 2.167372911 | 0.01670565 |
| <a href="#">R28660</a>  | -0.85859808 | -1.8785 | 2.187868845 | 0.01670565 |
| <a href="#">N66144</a>  | -0.85750082 | -1.7855 | 2.082213746 | 0.01670565 |
| <a href="#">W92703</a>  | -0.85641721 | -2.1615 | 2.523886702 | 0.01670565 |

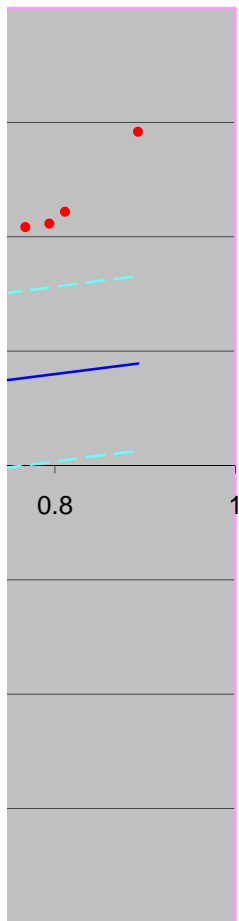

Supplement: 1471-2164-10-326-S3.pdf [file 1471-2164-10-326-S3.pdf]
