# Supplementary material for: A comparison of RNA amplification techniques at sub-nanogram input concentration
Source: PubMed Central journal article supplement (PMC2724417; doi:10.1186/1471-2164-10-326), 2009-07-20
Supplement: 1471-2164-10-326-S1.pdf [file 1471-2164-10-326-S1.pdf]

| Gene    | Accession Number | Delta Delta of Total RNA |
|---------|------------------|--------------------------|
| THSB2   | H38240           | -21.17                   |
| APOB    | H93837           | -15.57                   |
| PRG1    | AA278759         | -13.02                   |
| IGF2    | N54596           | -12.36                   |
| MMP3    | W51794           | -12.24                   |
| TF      | H69531           | -11.2                    |
| CAV1    | AA055835         | -10.71                   |
| FN1     | R62612           | -8.49                    |
| FGF7    | AA009609         | -6.97                    |
| TGFB    | AA233809         | -4.61                    |
| TIMP2   | AA486280         | -3.42                    |
| LEUP    | W49781           | -2.94                    |
| TM4SF1  | AA487893         | -2.55                    |
| PGCP    | AA460833         | -1.84                    |
| CDK6    | CDK6             | -0.69                    |
| ANXA1   | H63077           | -0.24                    |
| MADH    | R82176           | -0.23                    |
| ELK1    | AA844141         | 0.03                     |
| CASP2   | R37937           | 0.24                     |
| TRAF3   | AA504259         | 0.47                     |
| MMD     | AA454572         | 0.55                     |
| DFP     | AA487452         | 1.08                     |
| GRP     | AA026118         | 1.89                     |
| NUP88   | AA479888         | 2.85                     |
| RAE1    | AA504128         | 3.19                     |
| CDH1    | H97778           | 4.08                     |
| CCNG2   | AA489752         | 4.11                     |
| IGFBP5  | H08560           | 4.94                     |
| CLA4    | AA430665         | 5.15                     |
| MGP     | AA155913         | 5.19                     |
| PIP5K2B | H80359           | 5.56                     |
| PRLR    | R63647           | 5.75                     |
| v-erbB  | AA443351         | 6.81                     |
| CEACAM6 | AA054073         | 7.76                     |
| APM2    | AA478298         | 8.24                     |
| TCN1    | AA155695         | 9.22                     |
| GUSB    | N34827           | N/A                      |
