# Supplementary material for: A comparison of RNA amplification techniques at sub-nanogram input concentration
Source: PubMed Central journal article supplement (PMC2724417; doi:10.1186/1471-2164-10-326), 2009-07-20

### Dynamic Range of QPCR probes for BT474 Versus StratRef

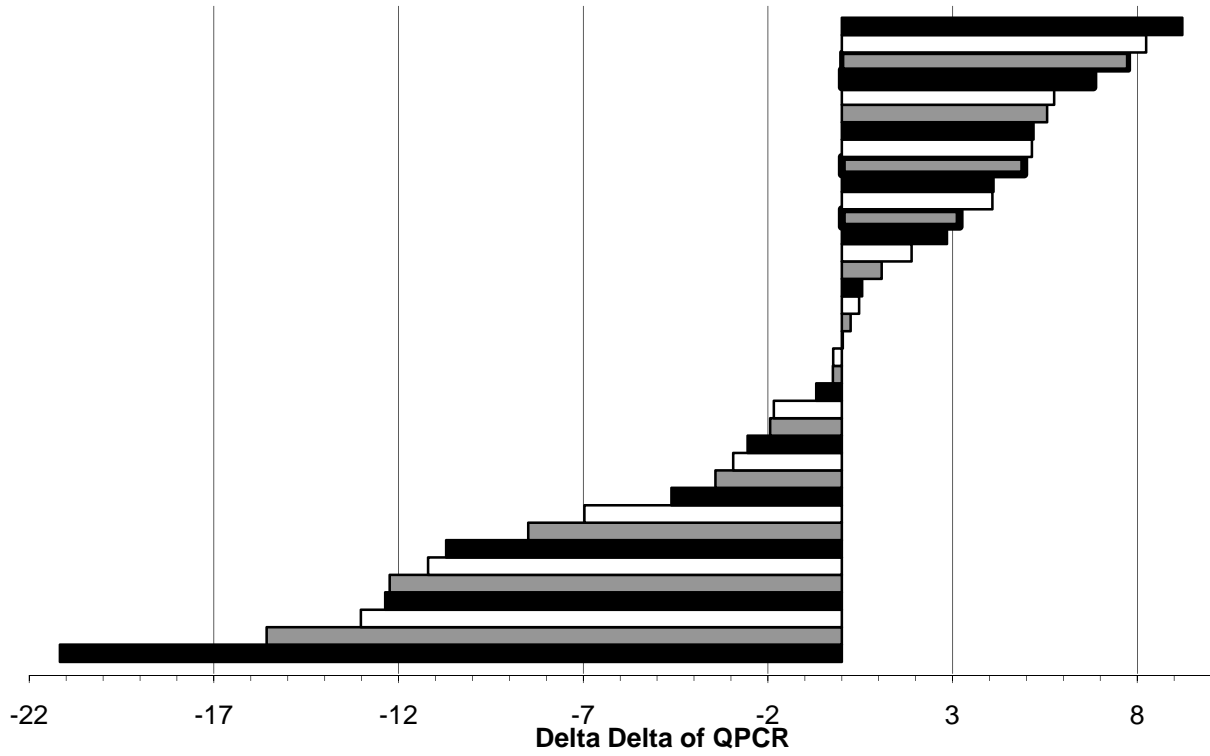

Supplement: 1471-2164-10-326-S2.pdf [file 1471-2164-10-326-S2.pdf]
